# Supplementary material for: You Only Put Your Nanoparticle: A Fully Automated System for Nanoparticle Washing Enabled by Vision and Language AI
Source: Research Square preprint supplement (doi:10.21203/rs.3.rs-7060706/v1), 2025-07-29
Supplement: Supplementary file 1 [file ba82d39fcd41b8979133a1ac.docx]

Supplementary Information for

# You Only Put Your Nanoparticle: A Fully Automated System for Nanoparticle Washing Enabled by Vision and Language AI

*Heeseung Lee1, 2, Daeho Kim,1,3, Heyin Lee4, Namyoung Gwak5, Nayeon Kim,1,6, Hyuk Jun Yoo1, Taekyung Yu4, Nuri Oh5, Seok Su Sohn2,*and Sang Soo Han1,**

1Computational Science Research Center, Korea Institute of Science and Technology, Seoul 02792, Republic of Korea

2Department of Materials Science and Engineering, Korea University, 145 Anam-ro,

Seoul 02841, Republic of Korea

3Department of Chemical and Biological Engineering, Korea University, Seoul 02841, Republic of Korea

4Department of Chemical Engineering, College of Engineering, Integrated Engineering Major, Kyung Hee University, Yongin, 17140, Republic of Korea

5Division of Materials Science and Engineering, Hanyang University, 222 Wangsimni-ro, Seongdong-gu, Seoul 04763, Republic of Korea

6Department of Chemistry, Korea University, Seoul 02841, Republic of Korea

*Correspondence to sangsoo@kist.re.kr (S.S.H.); sssohn@korea.ac.kr(S.S.S)

**Table of contents**

You Only Put Your Nanoparticle: A Fully Automated System for Nanoparticle Washing Enabled by Vision and Language AI 1

1. Hardware Setting 4

Supplementary Figure S1. Automated Nanoparticle Washing System 4

Supplementary Figure S2. Robotic arm and Grippers 5

Supplementary Figure S3. Custom-Designed Multi-Dispenser for Automated liquid handling 6

Supplementary Figure S4. Lateral Actuator for Chemical Vessel Transport 7

Supplementary Figure S5. Custom-Designed Centrifuge with Automated Door Control system 8

Supplementary Figure S6. Ultrasonic Bath and 3d Printed holder 9

Supplementary Figure S7. Custom-Designed Holder for Aligning and Storing Chemical Vessel 10

Supplementary Figure S8. Capping Machine for Opening and Closing of Chemical Vessel 11

Supplementary Figure S9. Pump & Pump Precision Test 12

Supplementary Table S1. Pump & Pump Precision Test 12

2. Robot Motion Planning With Computer Vision 13

Supplementary Figure S10. Performance Evaluation of YOLACT for Centrifugation Task 13

Supplementary Figure S11. Color-Based Inference for Determining Pick-and-Place Sequence 14

Supplementary Figure S12. Training and Inference Process of Latent Mask R-CNN 15

Supplementary Figure S13. Inference Results for NiFe-LDH Sample 16

Supplementary Figure S14. Inference Results Latent Mask RCNN (Ir-Ru Catalyst) 18

Supplementary Figure S15. Inference Results for Cdse/Cds Quantum dot 19

3. Washing Method Recommendation System via LLM 20

Supplementary Figure S16. Build the vector store for RAG 20

Supplementary Figure S17. Input Information for generate the recipe 21

Supplementary Figure S18. Prompt Structure for RAG 23

Supplementary Figure S19. Prompt Structure for LLM Only 25

Supplementary Figure S20. Prompt Structure for Failure Feedback 27

Supplementary Figure S21. TaskPlanner JSON generated by the LLM for an NiFe-LDH-Based catalyst. 29

Supplementary Figure S22. TaskPlanner JSON generated by the LLM for an IrRu catalyst. 30

Supplementary Figure S23. TaskPlanner JSON generated by the LLM for an IrRu catalyst – Failure Feedback Loop 31

Supplementary Figure S24. TaskPlanner JSON generated by the LLM for a CdSe/Cds Quantum dot 32

Supplementary Figure S25. TaskPlanner JSON generated by the LLM for a CdSe/Cds Quantum dot – Failure Feedback Loop 33

Supplementary Figure S26. Retrieval System Performance test 34

Supplementary Table S2. Retrieval System Performance test 34

4. Materials and Synthesis Details 35

Reference 38

# Hardware Setting

##
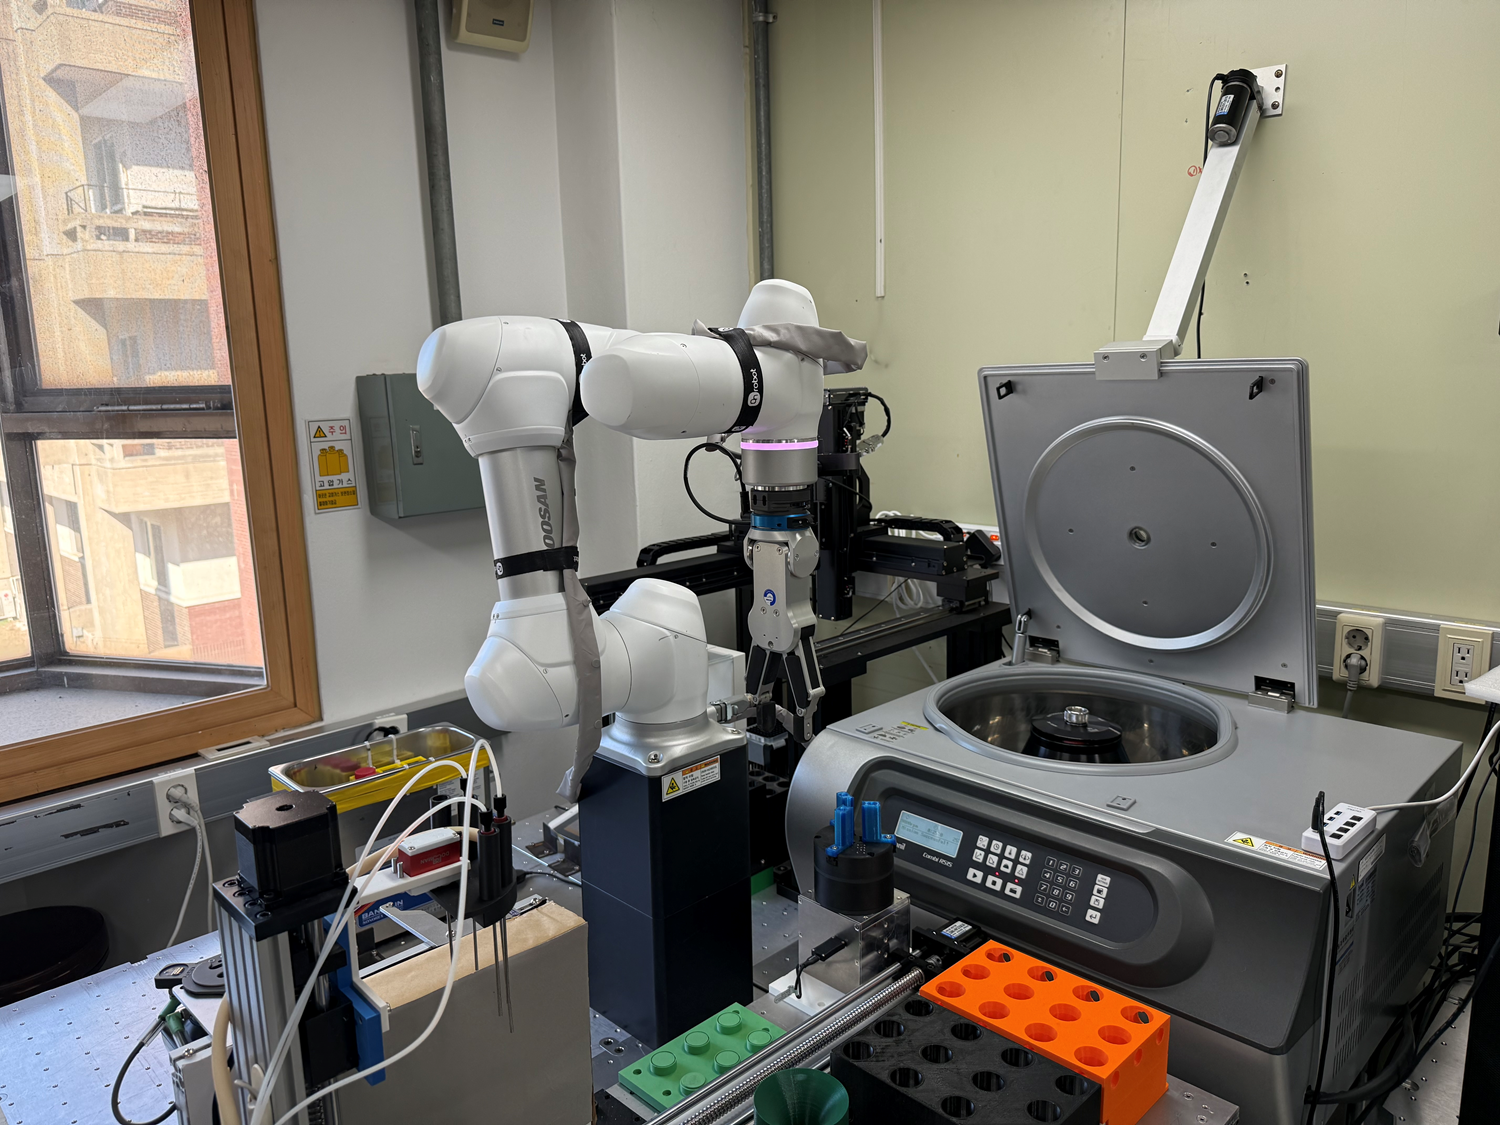


Supplementary Figure S1. Bird’s-eye-view of the automated system designed for efficient post-synthesis washing of nanoparticles. The platform incorporates a collaborative robotic arm, a centrifuge, and modular components to enable precise, consistent, and reproducible sample handling.

##
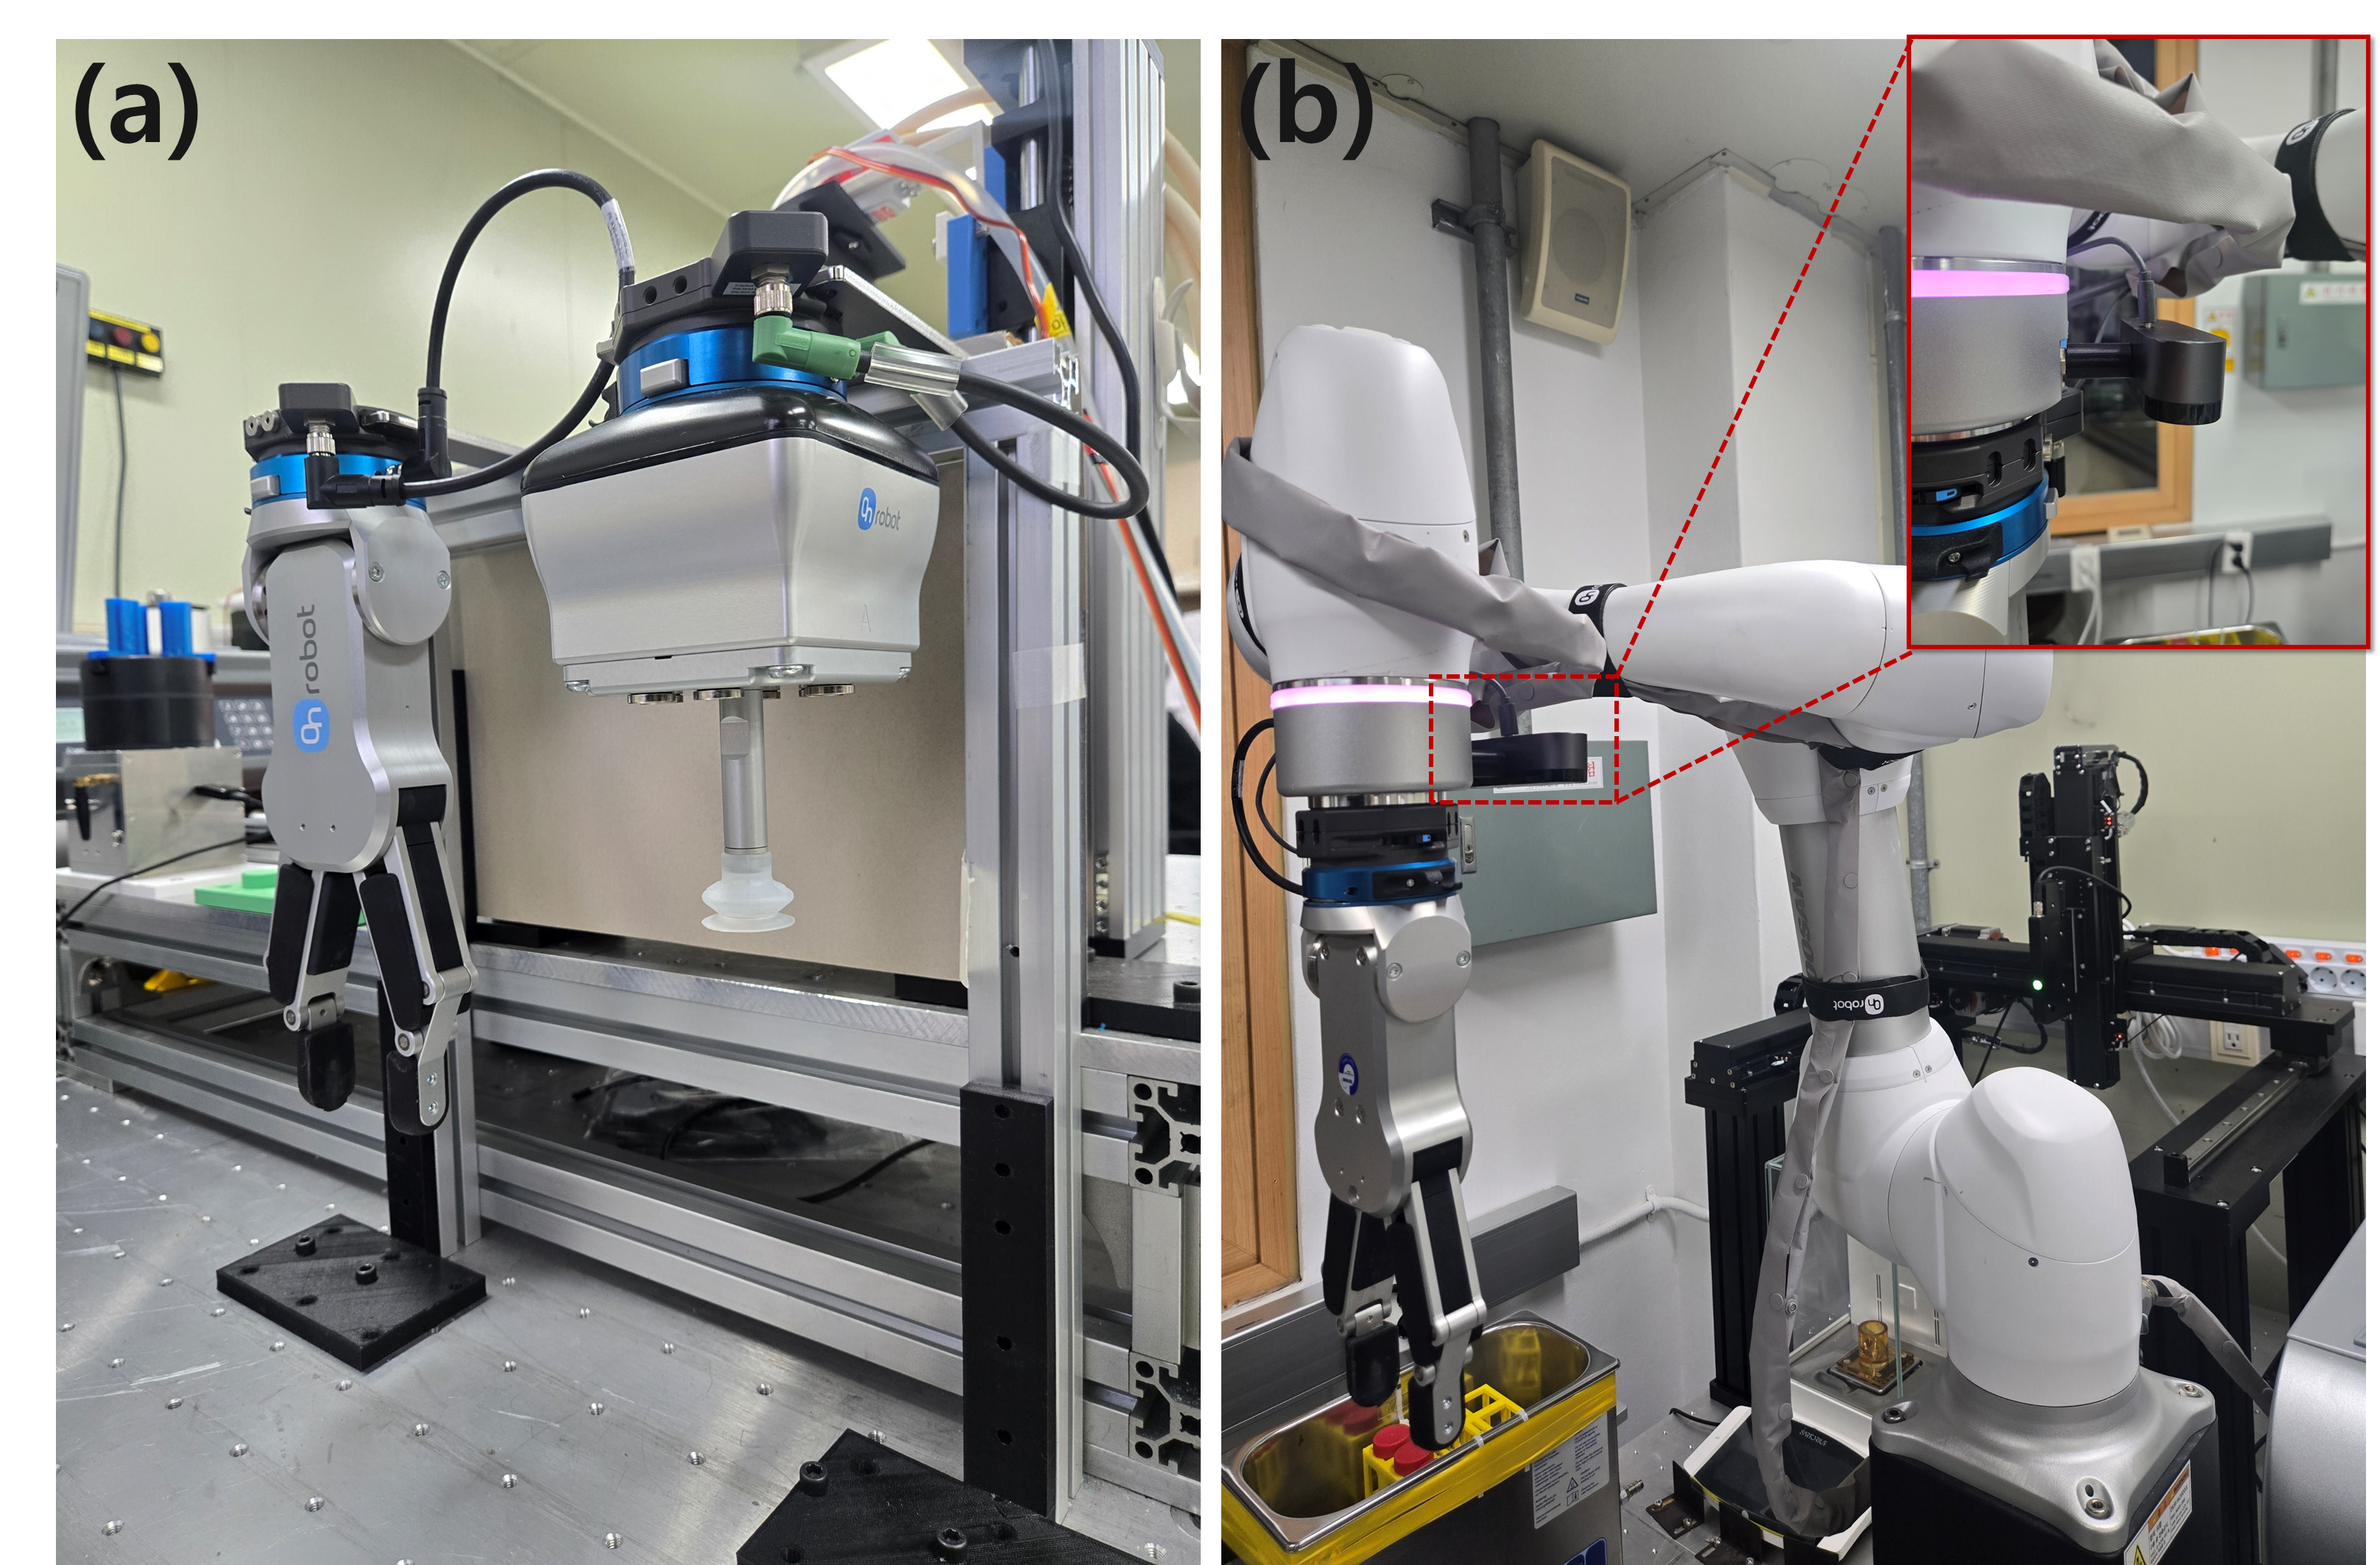


Supplementary Figure S2. (a) Doosan Robotics M0609 collaborative robotic arm equipped with a **Logitech BRIO 4K webcam** (highlighted in red) for computer vision applications. (b) Grippers configuration featuring an **OnRobot RG6 two-finger gripper and a VCG10 vacuum gripper gripper, both** mounted using a **TripleA Robotics WINGMAN tool changer** to allow seamless switching between grasping and suction operations.

##
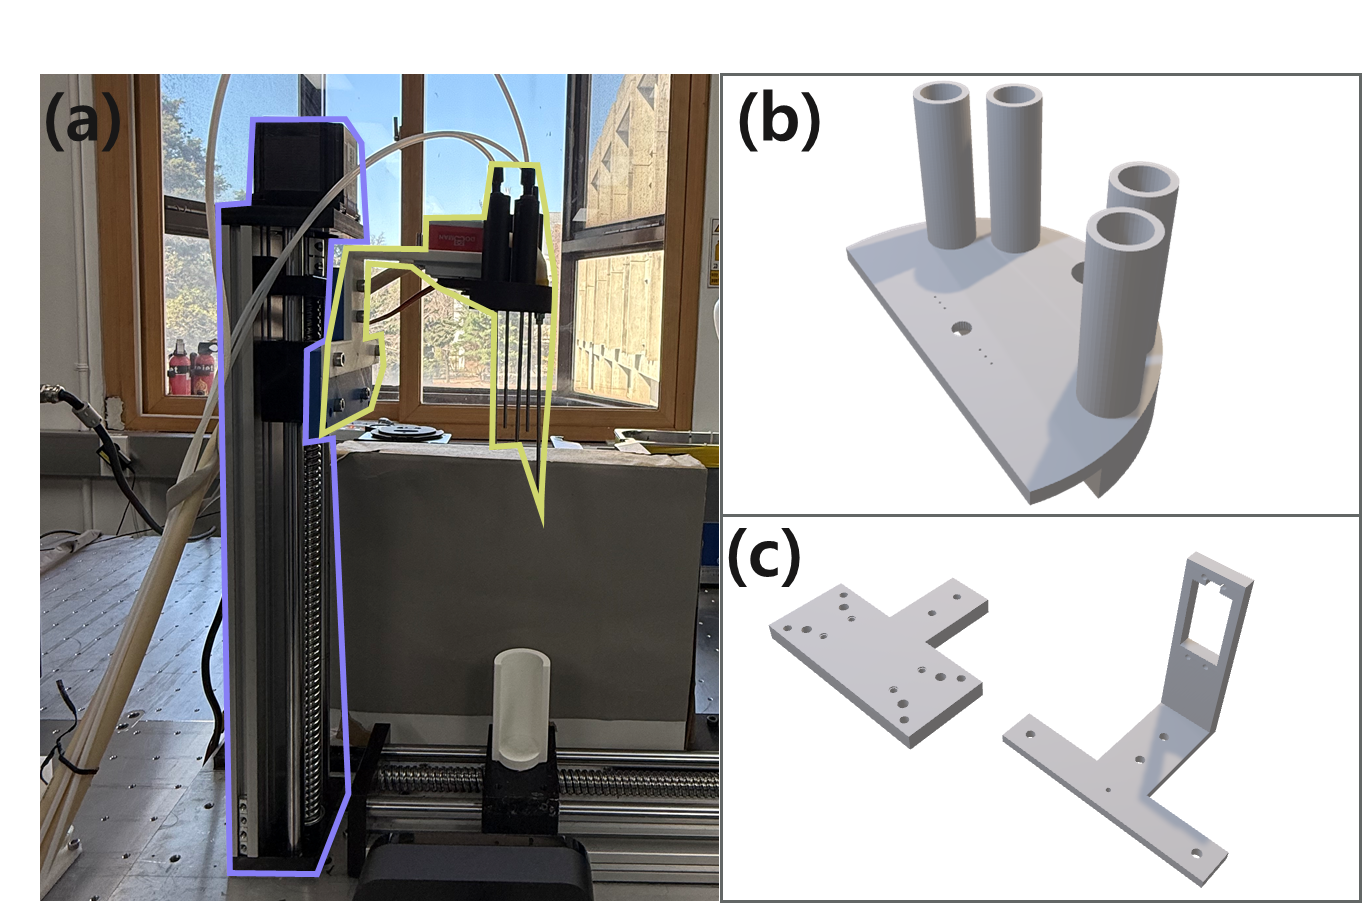


Supplementary Figure S3. (a) Fully assembled multi dispenser system comprising a **linear actuator (vertical travel range: 350 mm)**, an MG996R servo motor, and custom 3D-printed components designed for automated solvent dispensing and supernatant removal. (b) CAD rendering of the rotating dispenser tip holder, which accommodates multiple pipette tips—one central tip for supernatant removal and four surrounding tips for solvent injection. Rotation is actuated by the MG996R servo motor. (c) 3D-printed support structures: (left) a mounting fixture for the actuator and motor; (right) a bracket specifically designed to secure the MG996R servo motor.

##
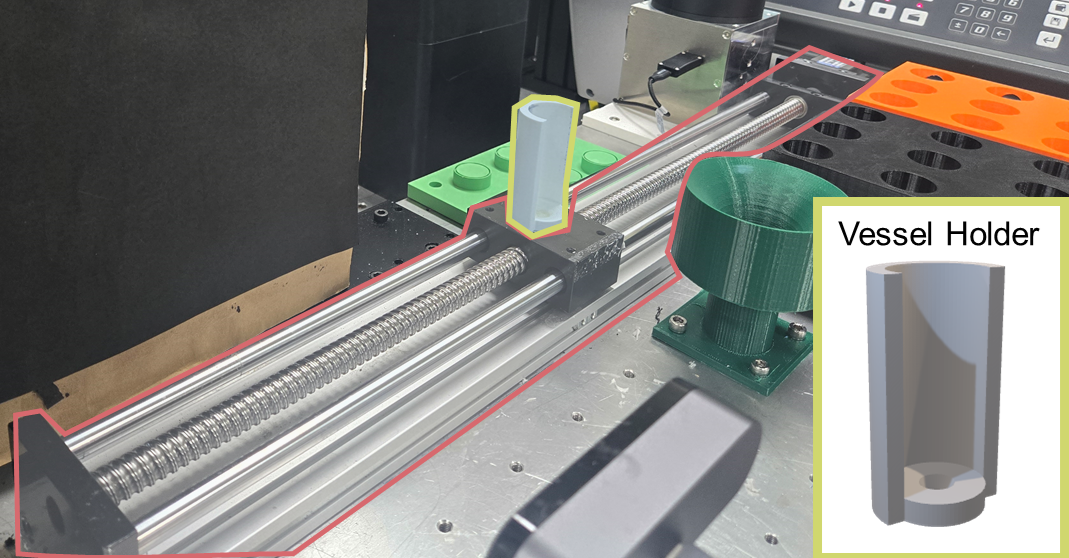


Supplementary Figure S. The actuator (highlighted in pink) enables lateral movement of the chemical vessel to the dispensing station, extending beyond the reach of the robotic arm. The vessel holder (highlighted in yellow) is designed to securely hold the vessel during transport while maintaining visibility for reliable computer vision detection.

##
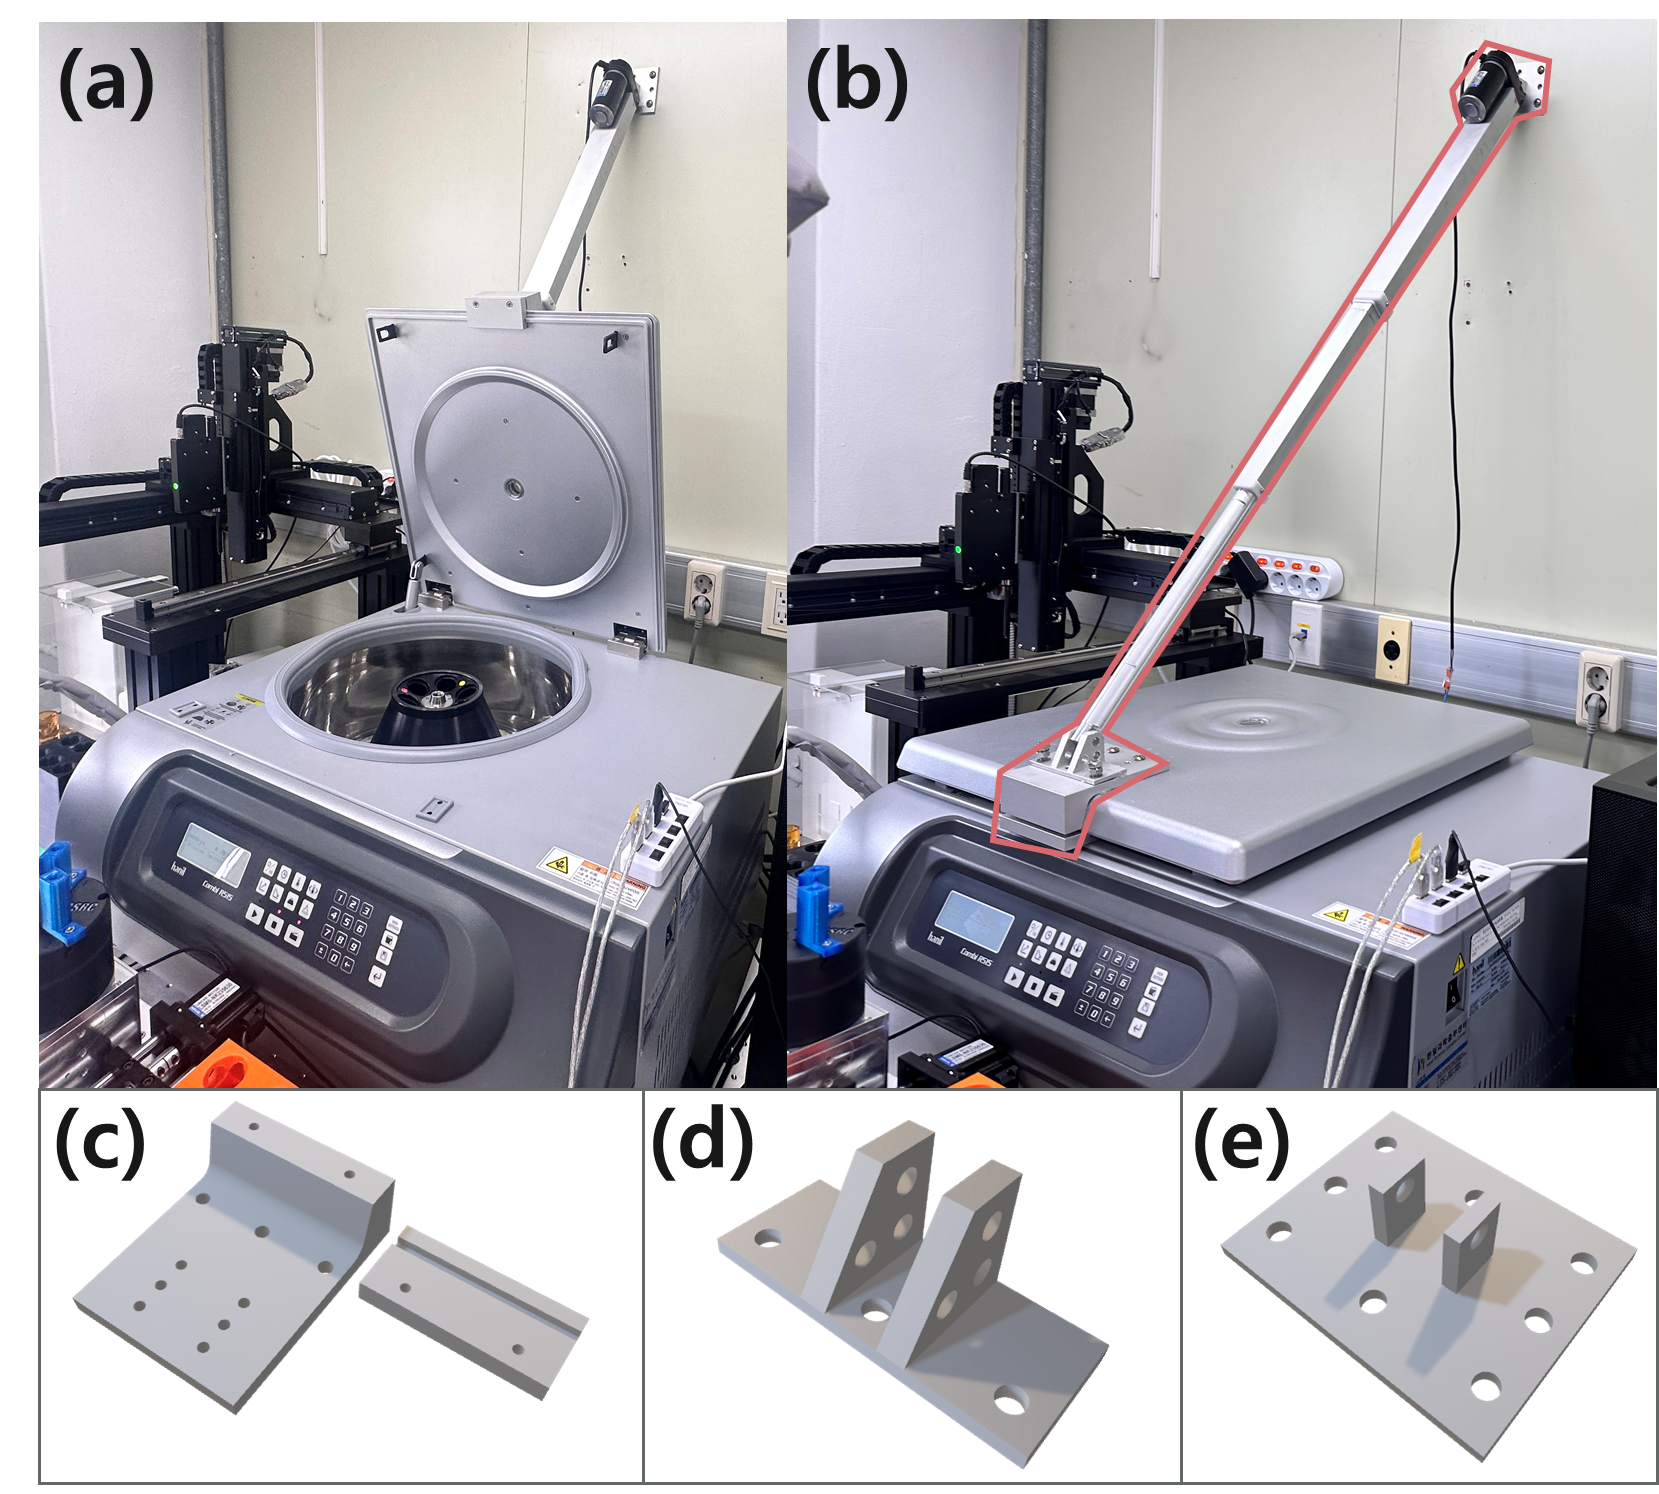


Supplementary Figure S. **(a)** **Combi R515 centrifuge (Hanil Science) in the door-open state**, modified with a custom actuator-based door control system. **(b)** Door-closed state. The actuator (highlighted in pink) enables fully automated opening and closing of the centrifuge lid. **(c)** Custom bracket for rigid attachment between the actuator and the centrifuge body. **(d)** Connector part linking the actuator to the mounting bracket. **(e)** Rear bracket designed for secure wall mounting of the actuator assembly.

##
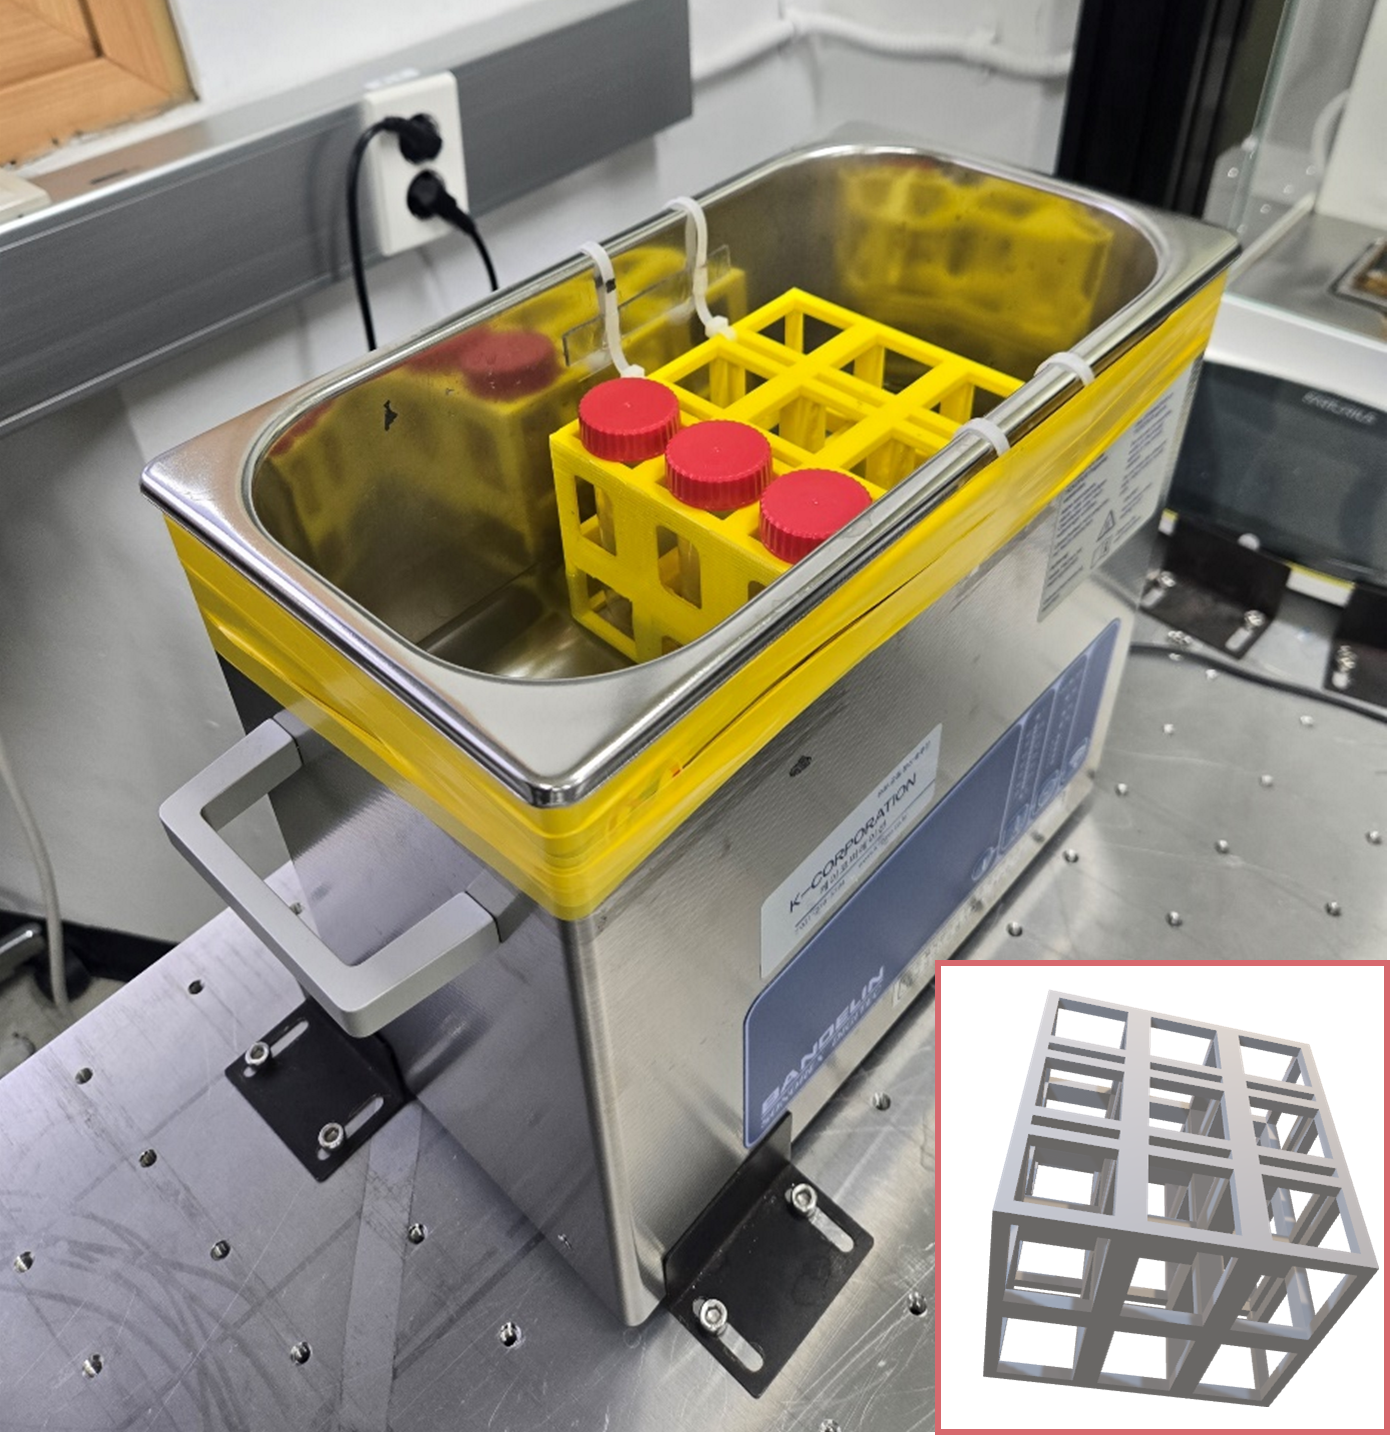


Supplementary Figure S. Ultrasonic bath (SONOREX DIGITEC 510, BANDELIN electronic GmbH & Co. KG) used for dispersing precipitates in solvent prior to centrifugation. The pink-highlighted component is a custom 3D-printed chemical vessel holder, engineered to ensure uniform transmission of ultrasonic wave across all vessels during the cleaning process.

##
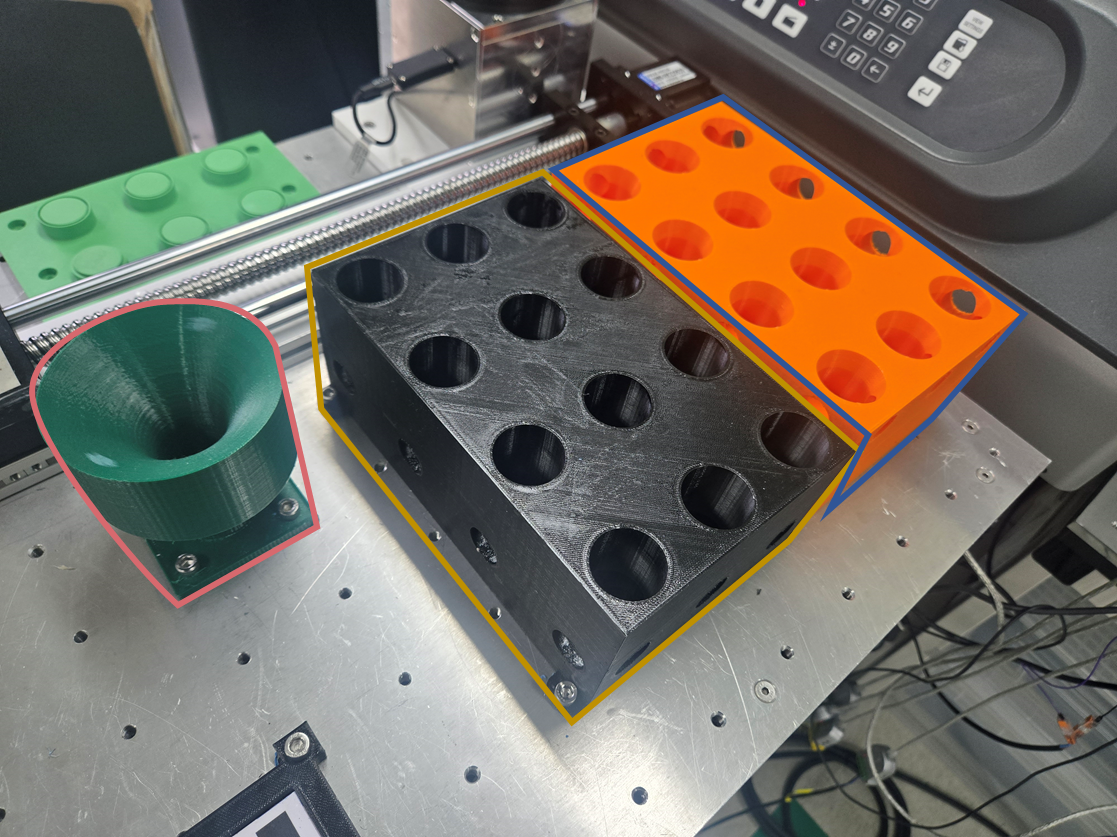


Supplementary Figure S. Custom-designed holders for the secure storage and precise positioning of various chemical vessels used in the automated workflow. The green holder (left, pink outline) align conical tubes (e.g., 50 mL) after centrifugation, enabling accurate placement by the VGC10 gripper. The black holder (center, yellow outline) is designed to securely store Falcon tubes in a fixed configuration. The orange holder (right, blue outline) accommodates vials containing synthesized samples, ensuring organized storage and easy access during automated workflows.

##
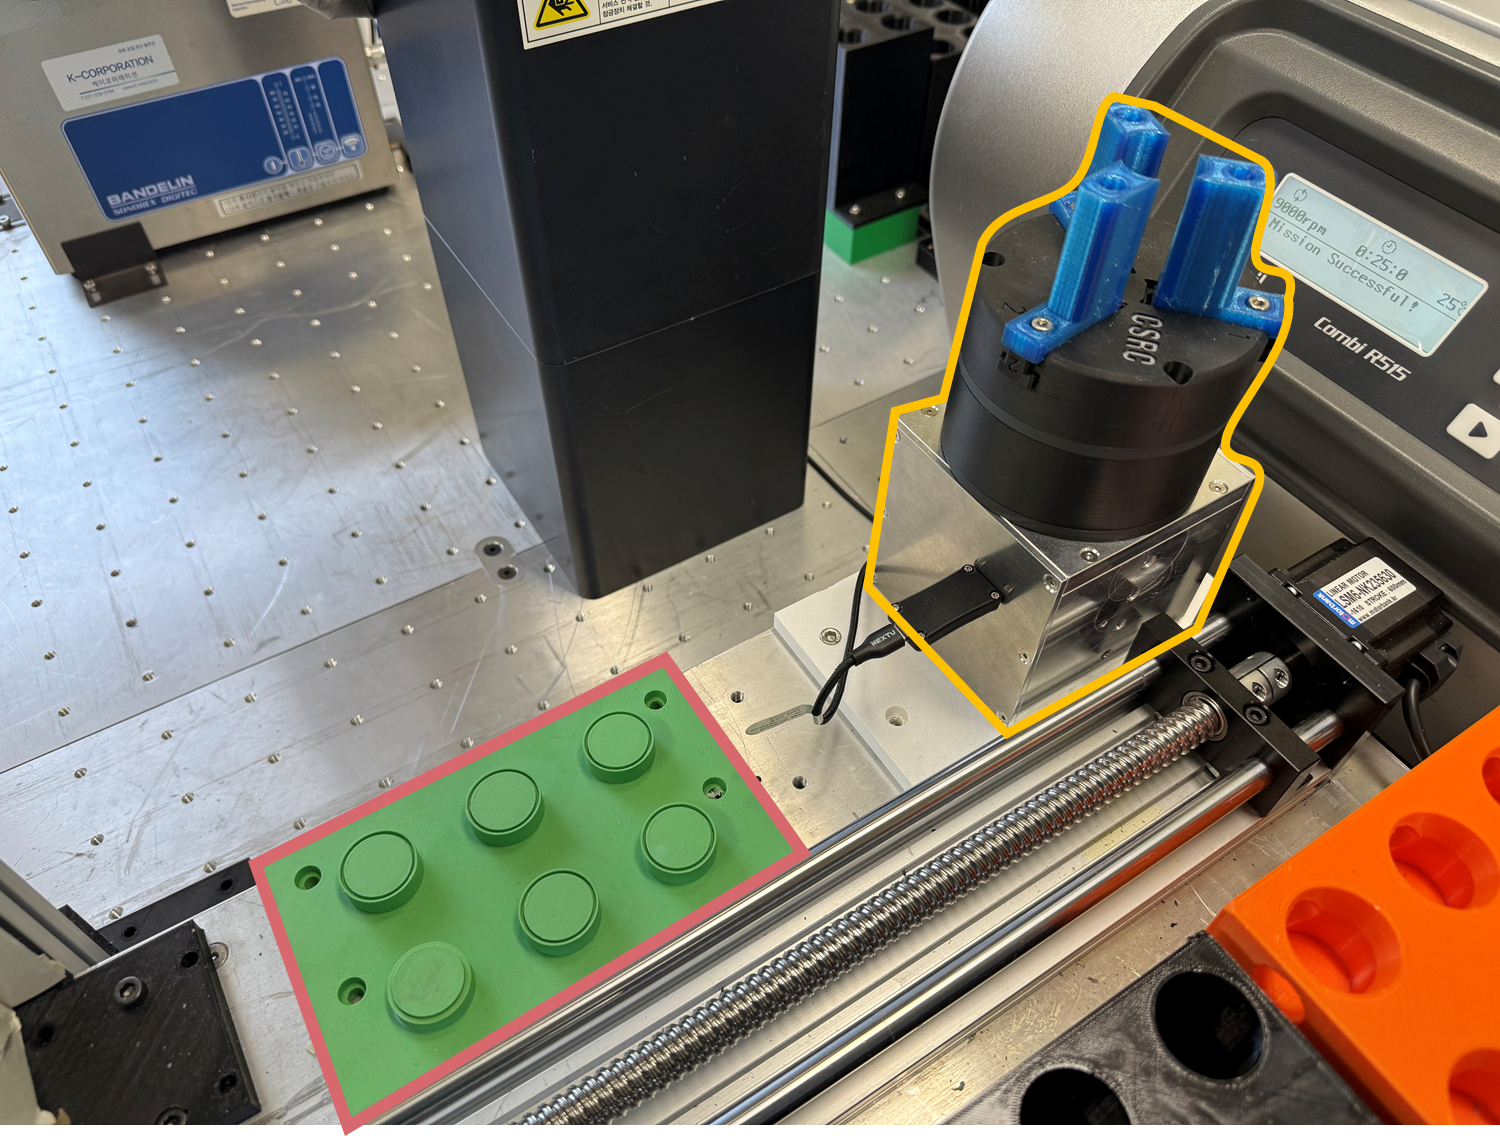


Supplementary Figure S. Custom-designed automated capping machine for **opening and closingcaps** on chemical vessels. The **bluechuck** securely holds the vessel in position, while the **rotatingblackbody** performs the capping and uncapping actions. The **greenholder** (pink outline) is used to **storecaps** during the operation, ensuring organized and efficient handling.

##

**Supplementary Figure S9.** Pump precision test

Supplementary Table S. Accuracy test of the dispensing pump using four different solvents: water, toluene, ethanol, and acetone. For each solvent, a total of 5 mL was dispensed 20 times, and the resulting weights were converted to volumes using the corresponding solvent densities. The standard deviation of the dispensed mass was 0.00213 g (water), 0.00391 g (toluene), 0.00055 g (ethanol), and 0.00397 g (acetone), indicating solvent-dependent variations in dispensing precision.

| Solvent | Density (g/mL) | Mean  (g) | Standard Deviation (g) |
| --- | --- | --- | --- |
| H2O | 0.997 | 4.786 | 0.00213 |
| Toluene | 0.867 | 4.300 | 0.00391 |
| Ethanol | 0.789 | 4.041 | 0.00055 |
| Acetone | 0.784 | 3.905 | 0.00397 |

# 2. Robot Motion Planning With Computer Vision


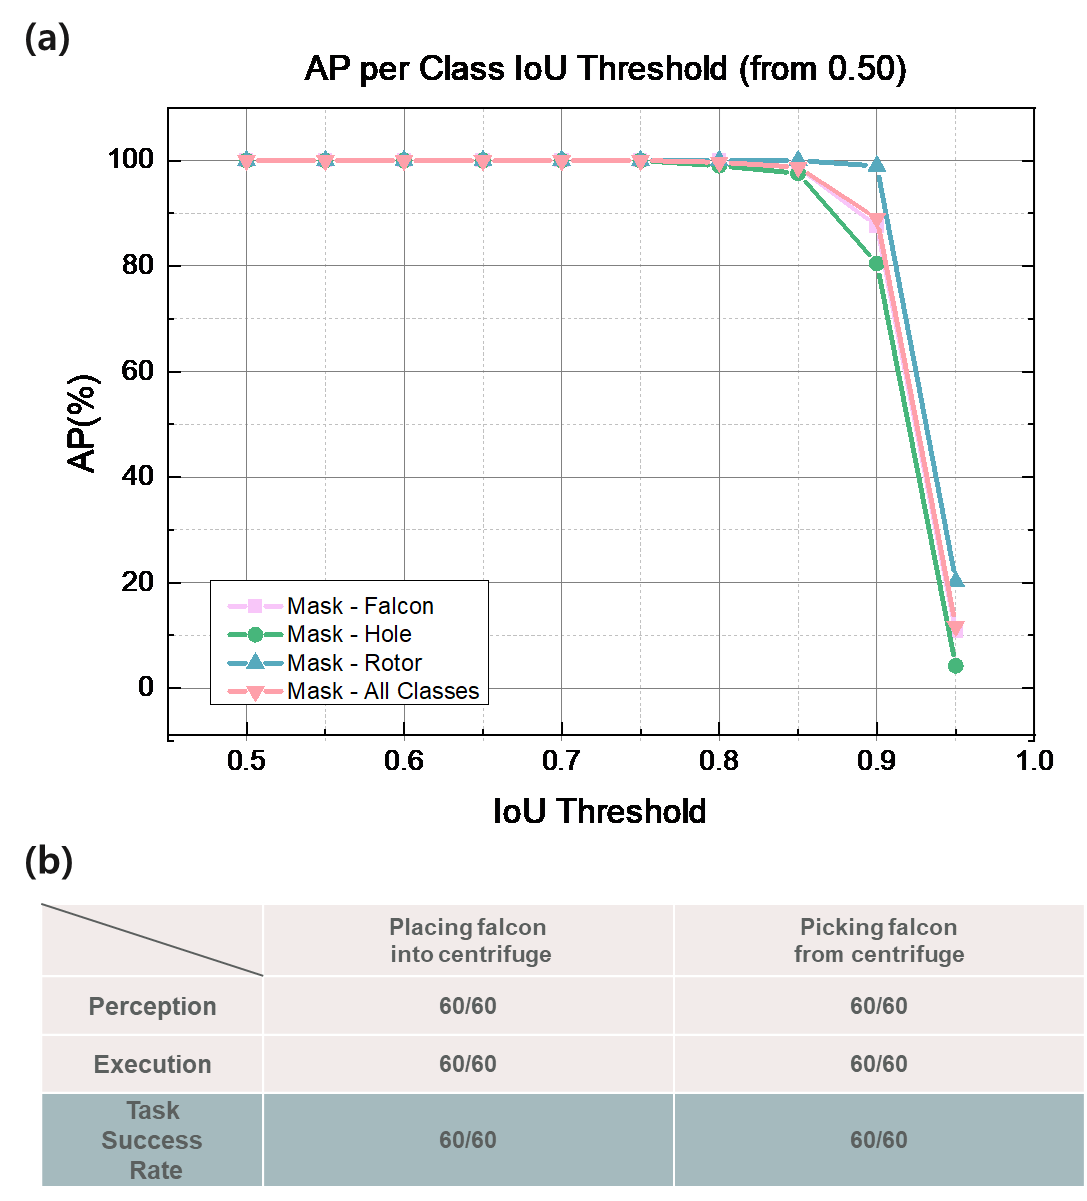


Supplementary Figure S10. (a) Instance segmentation performance of the YOLACT model, evaluated using Average Precision (AP) across various IoU thresholds for each object class (Falcon tube, hole, and rotor). The model consistently achieves high precision, exceeding 95% across most thresholds up to 0.9. (b) Task success rate in robotic centrifugation operations: all 60 trials were successfully completed for both placement and retrieval of Falcon tubes, demonstrating robust perception and reliable execution in real-world conditions.


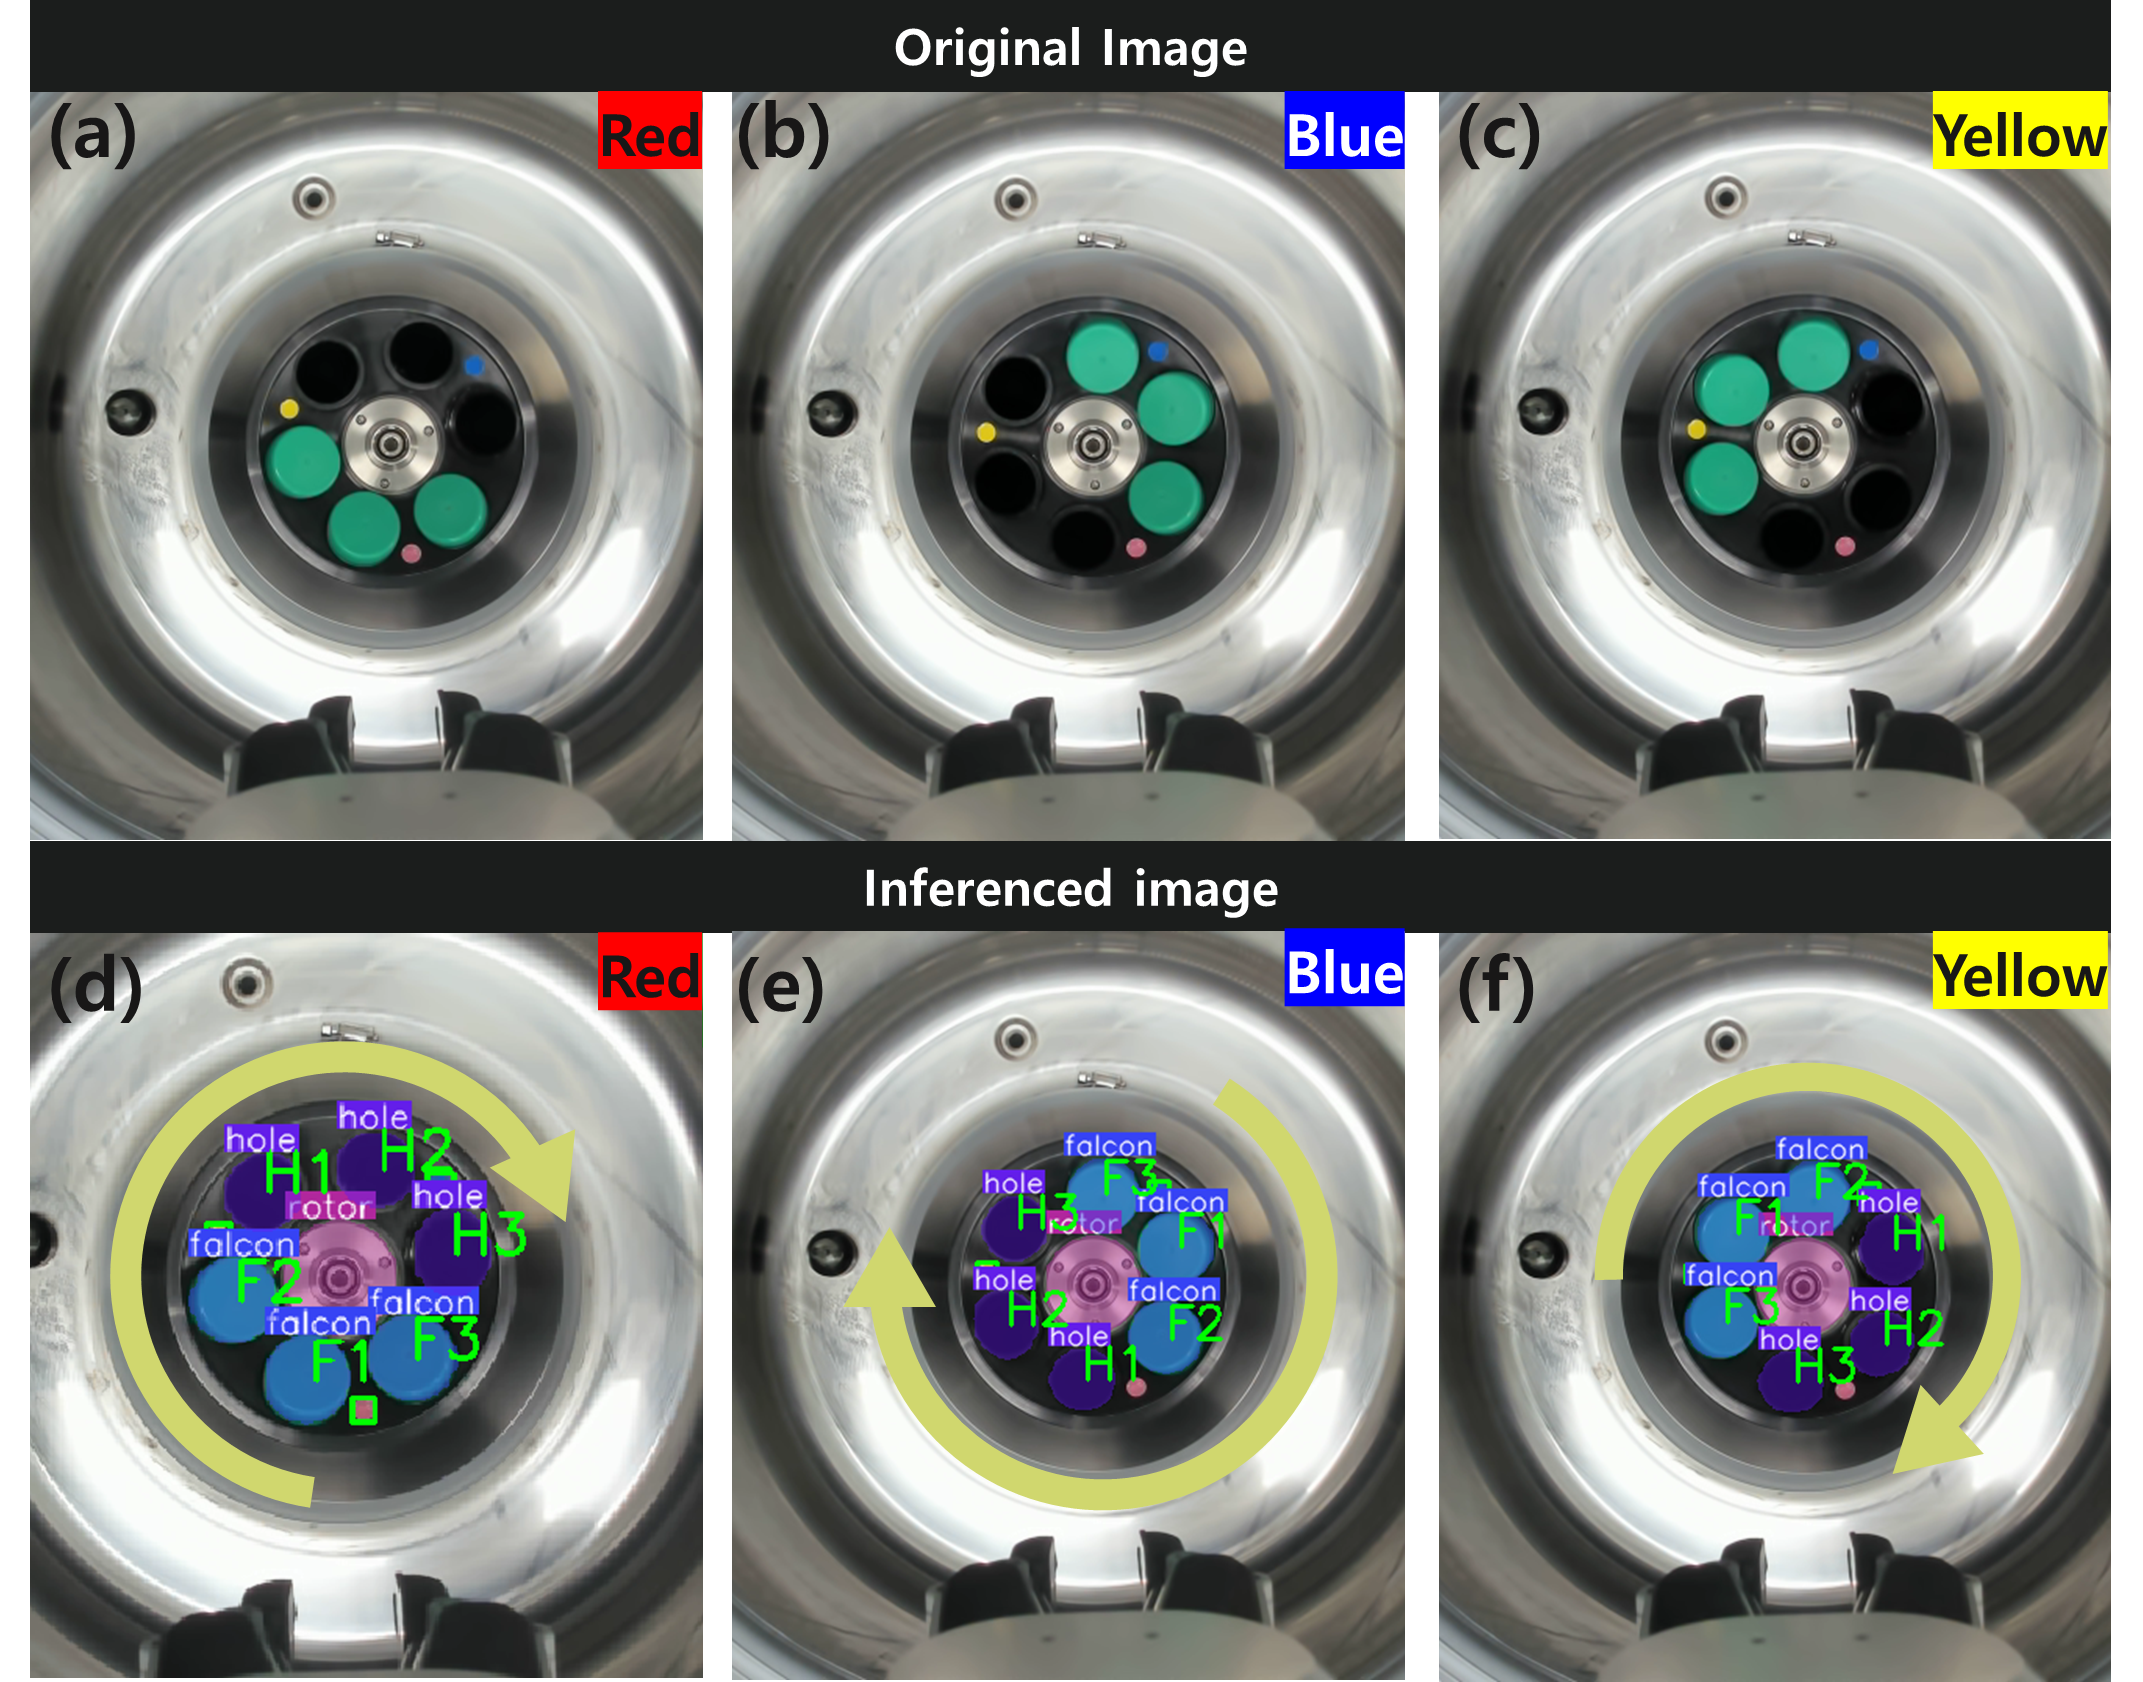


Supplementary Figure S11. (a–c) Input images displaying red, blue, and yellow color stickers affixed inside the rotor to encode task-specific instructions. (d–f) Corresponding inference results, where the model accurately interpreted the color-coded cues to determine the correct pick-and-place sequence, successfully reflecting the intended meaning of each color sticker.


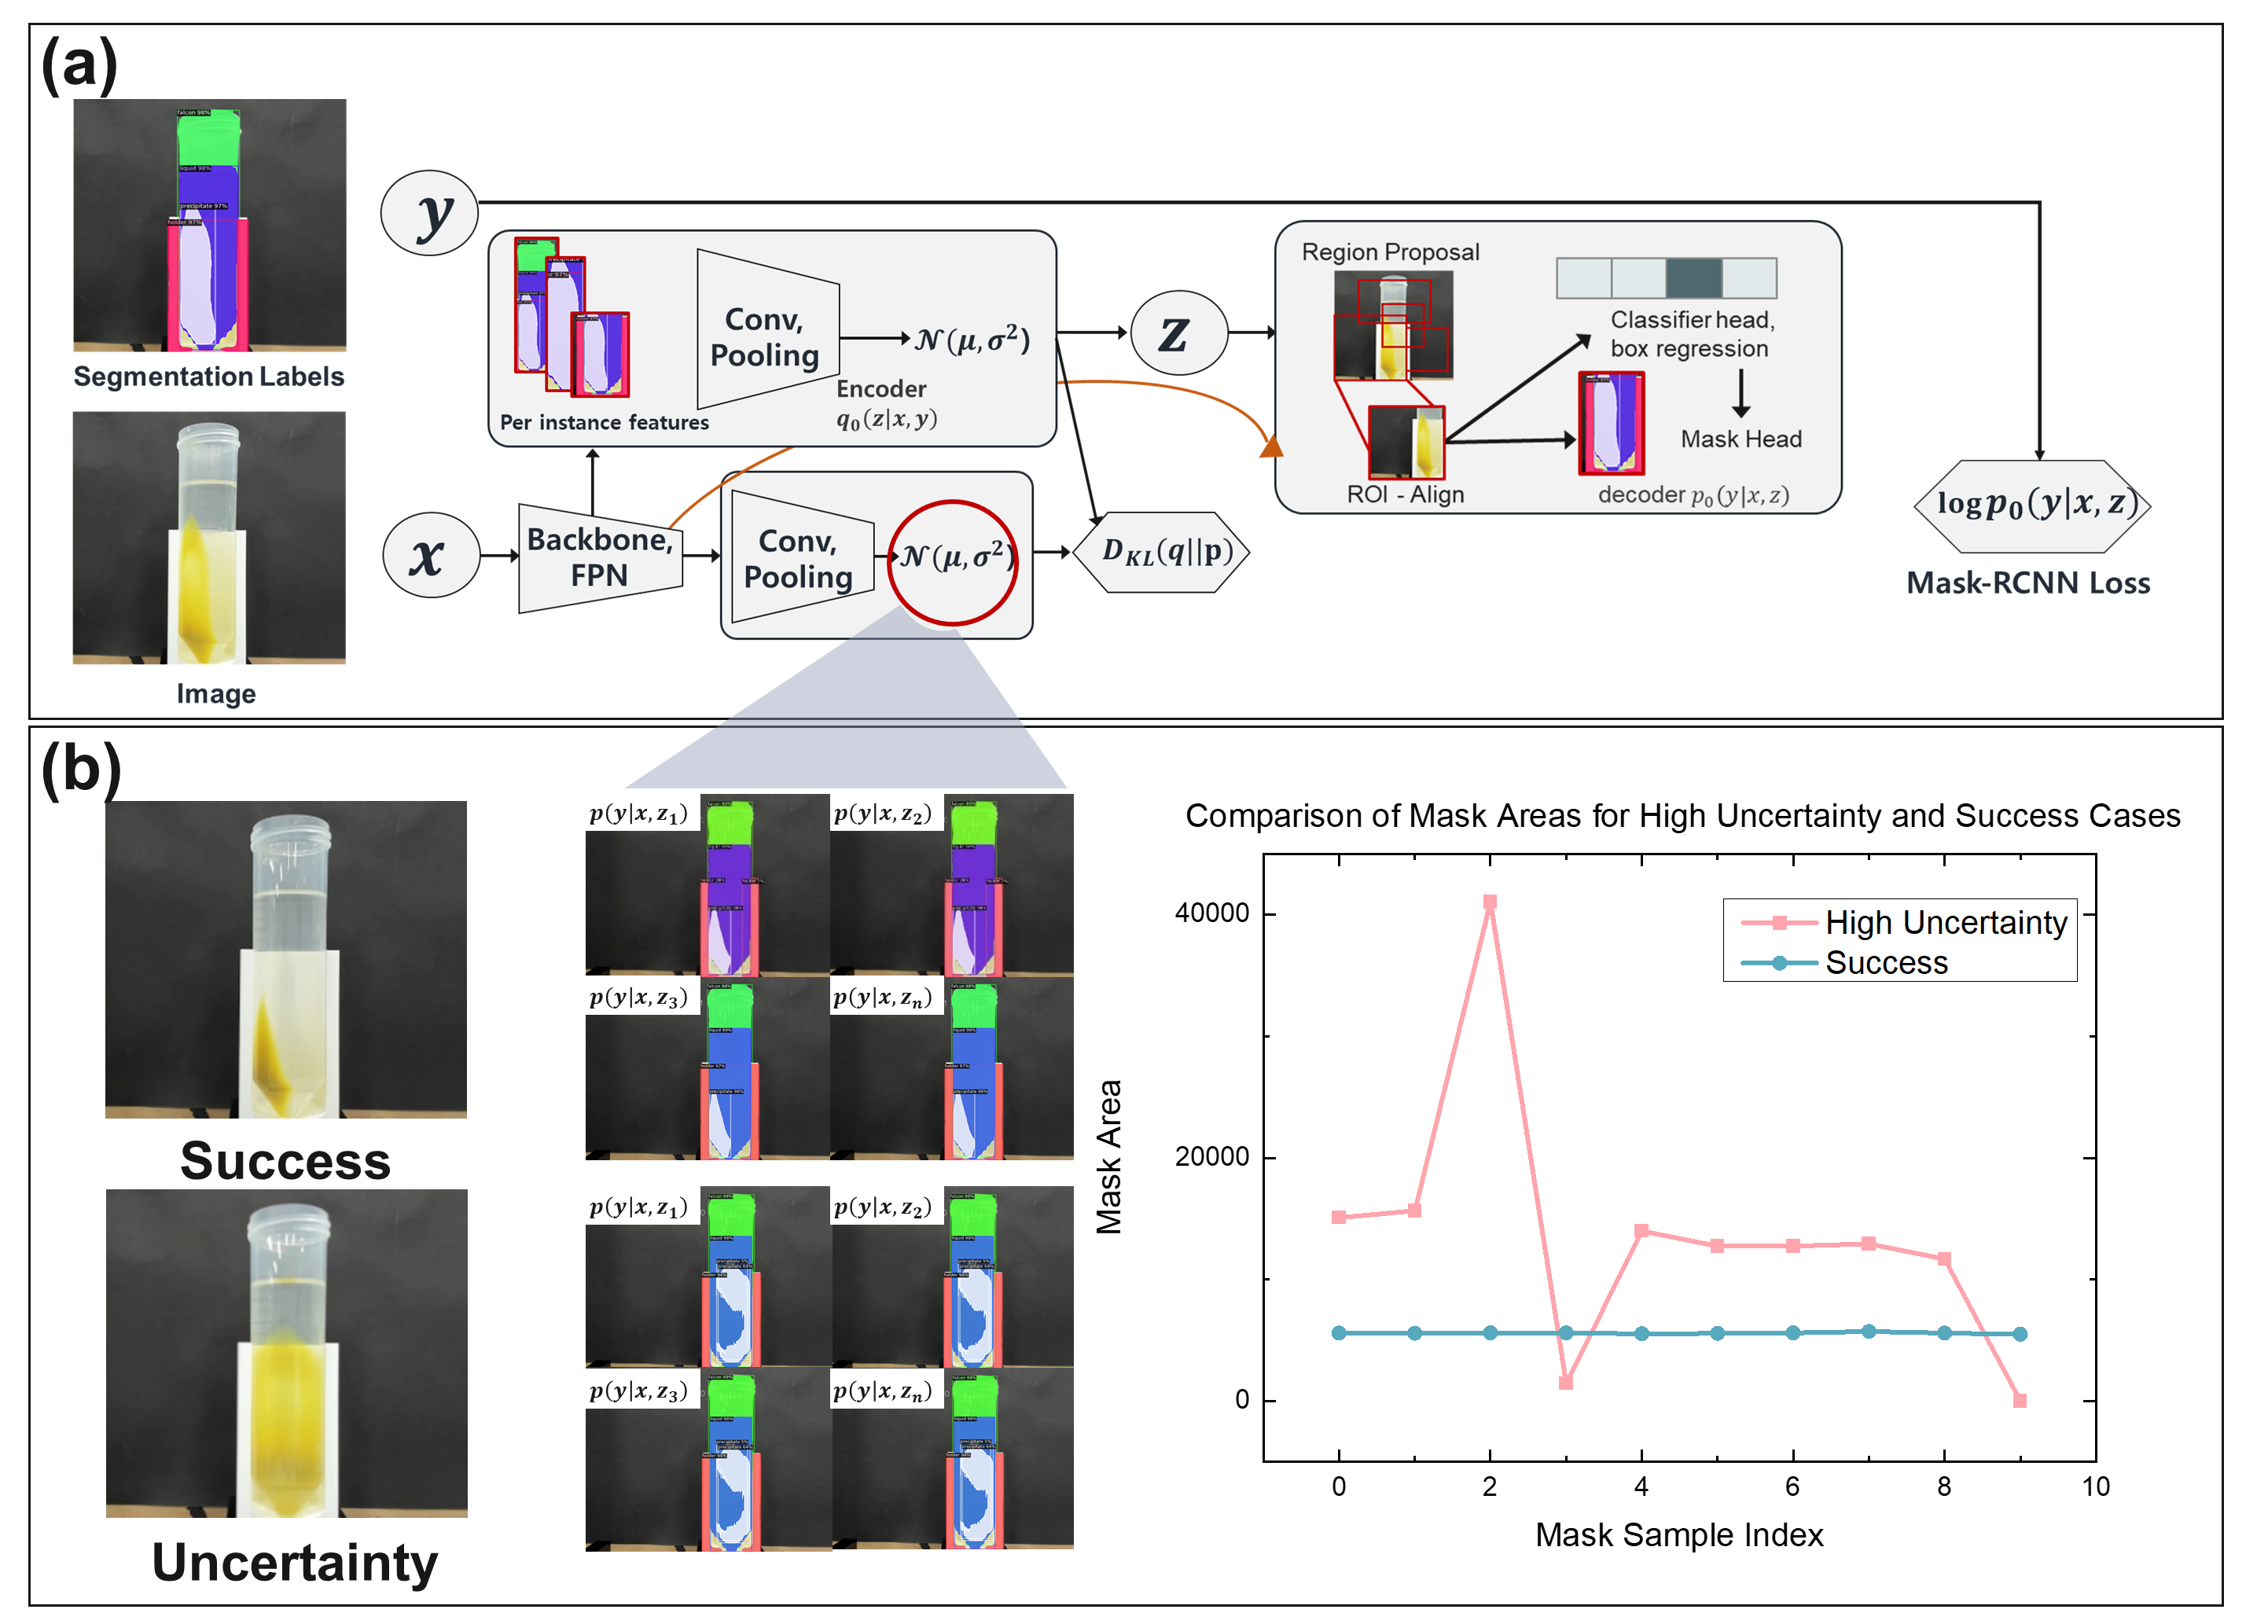


Supplementary Figure S12. **(a)** Network architecture of Latent Mask R-CNN, **reconstructed based on the original design presented in *Latent Mask R-CNN* (NeurIPS 2021)**. The model leverages latent variable sampling to enhance instance segmentation performance and to represent prediction uncertainty. **(b)** Visualization comparing successful inferences and high-uncertainty cases, including multiple mask samples generated through latent variables, with corresponding area comparison illustrating variability in segmentation results.

**
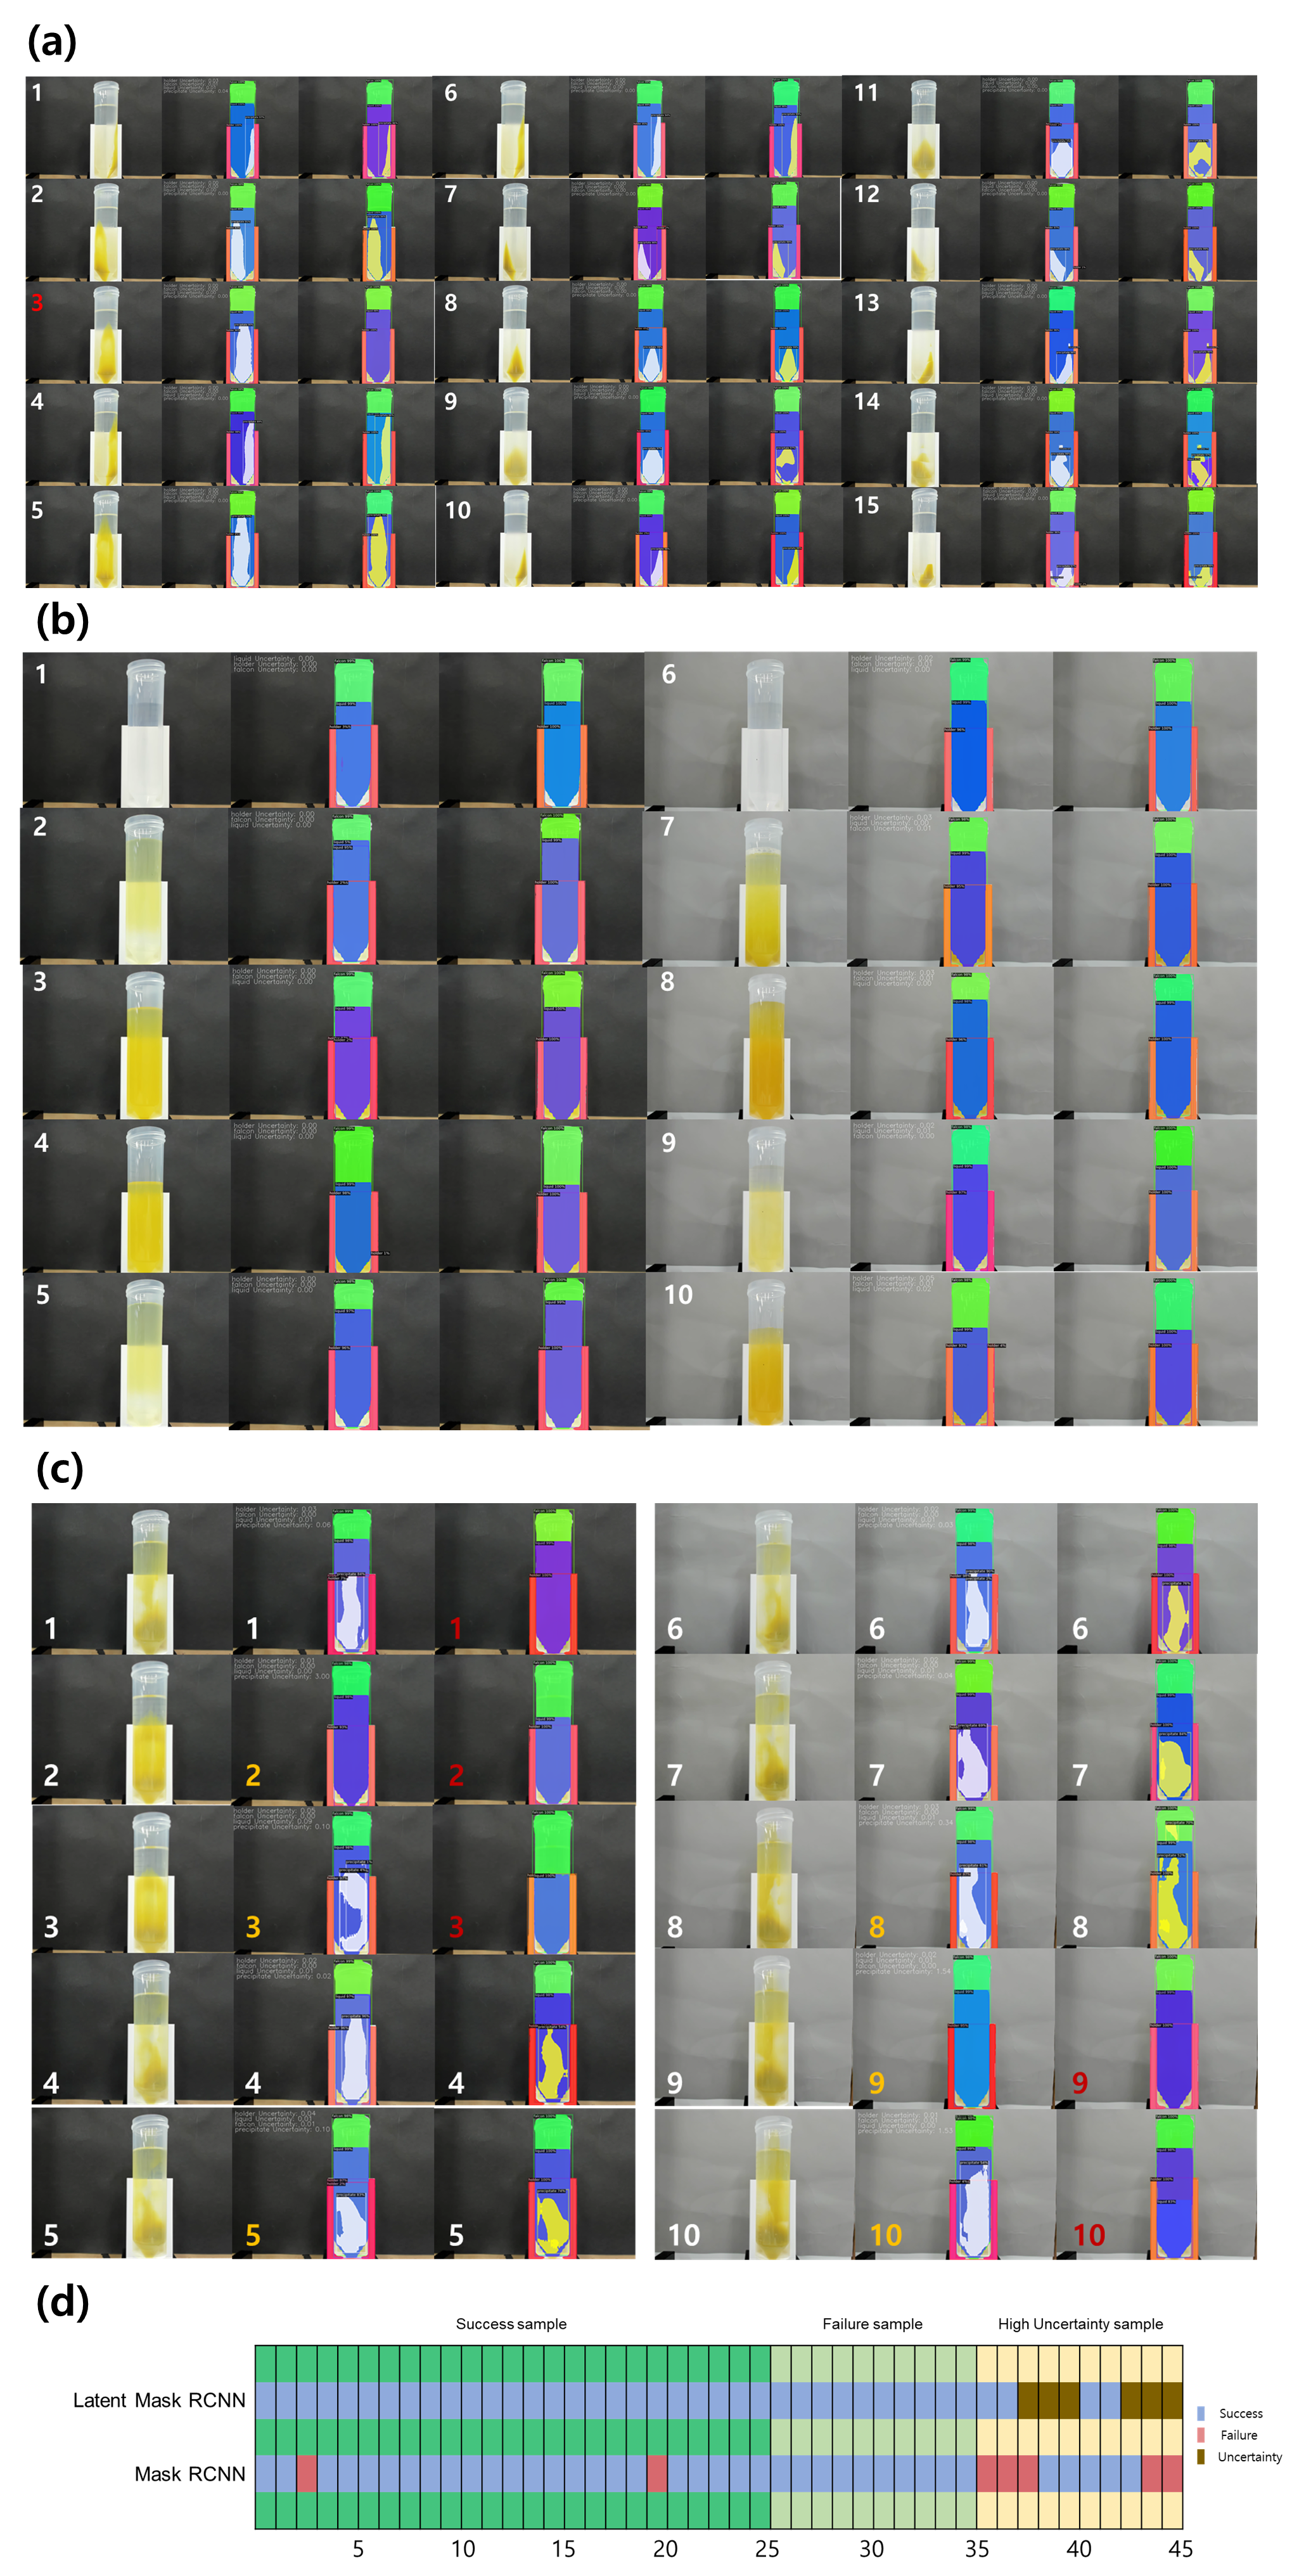
**

**Supplementary Figure S13**. (a) Samples with successful centrifugation. (b) Samples with failed centrifugation or no visible precipitate. (c) Visually ambiguous samples, where the distinction between liquid and precipitate is unclear to the human eye. For each numbered sample, three images are presented in sequence: the original input, the segmentation result from Latent Mask R-CNN, and the result from Mask R-CNN. (d) Summary table of predicted segmentation results for all samples.

The results in SupplementaryFigure S13 highlight the superior performance of Latent Mask R-CNN over Mask R-CNN in both segmentation accuracy and reliability. For example, in Figure S13 (a), Sample #3, Mask R-CNN failed to segment the precipitate region entirely, whereas Latent Mask R-CNN successfully identified it. This advantage is even more pronounced in Figure S13(c)**,** which includes visually ambiguous samples—cases where phase separation exists but is difficult to discern visually. In this subset, Mask R-CNN misclassified 5 out of 10 cases as lacking precipitate. In contrast, Latent Mask R-CNN avoided such false negatives by generating segmentation masks with high uncertainty, signaling the need for additional inspection or manual verification. This probabilistic behavior offers a more cautious and interpretable segmentation approach, particularly valuable in borderline cases or uncertain cases.


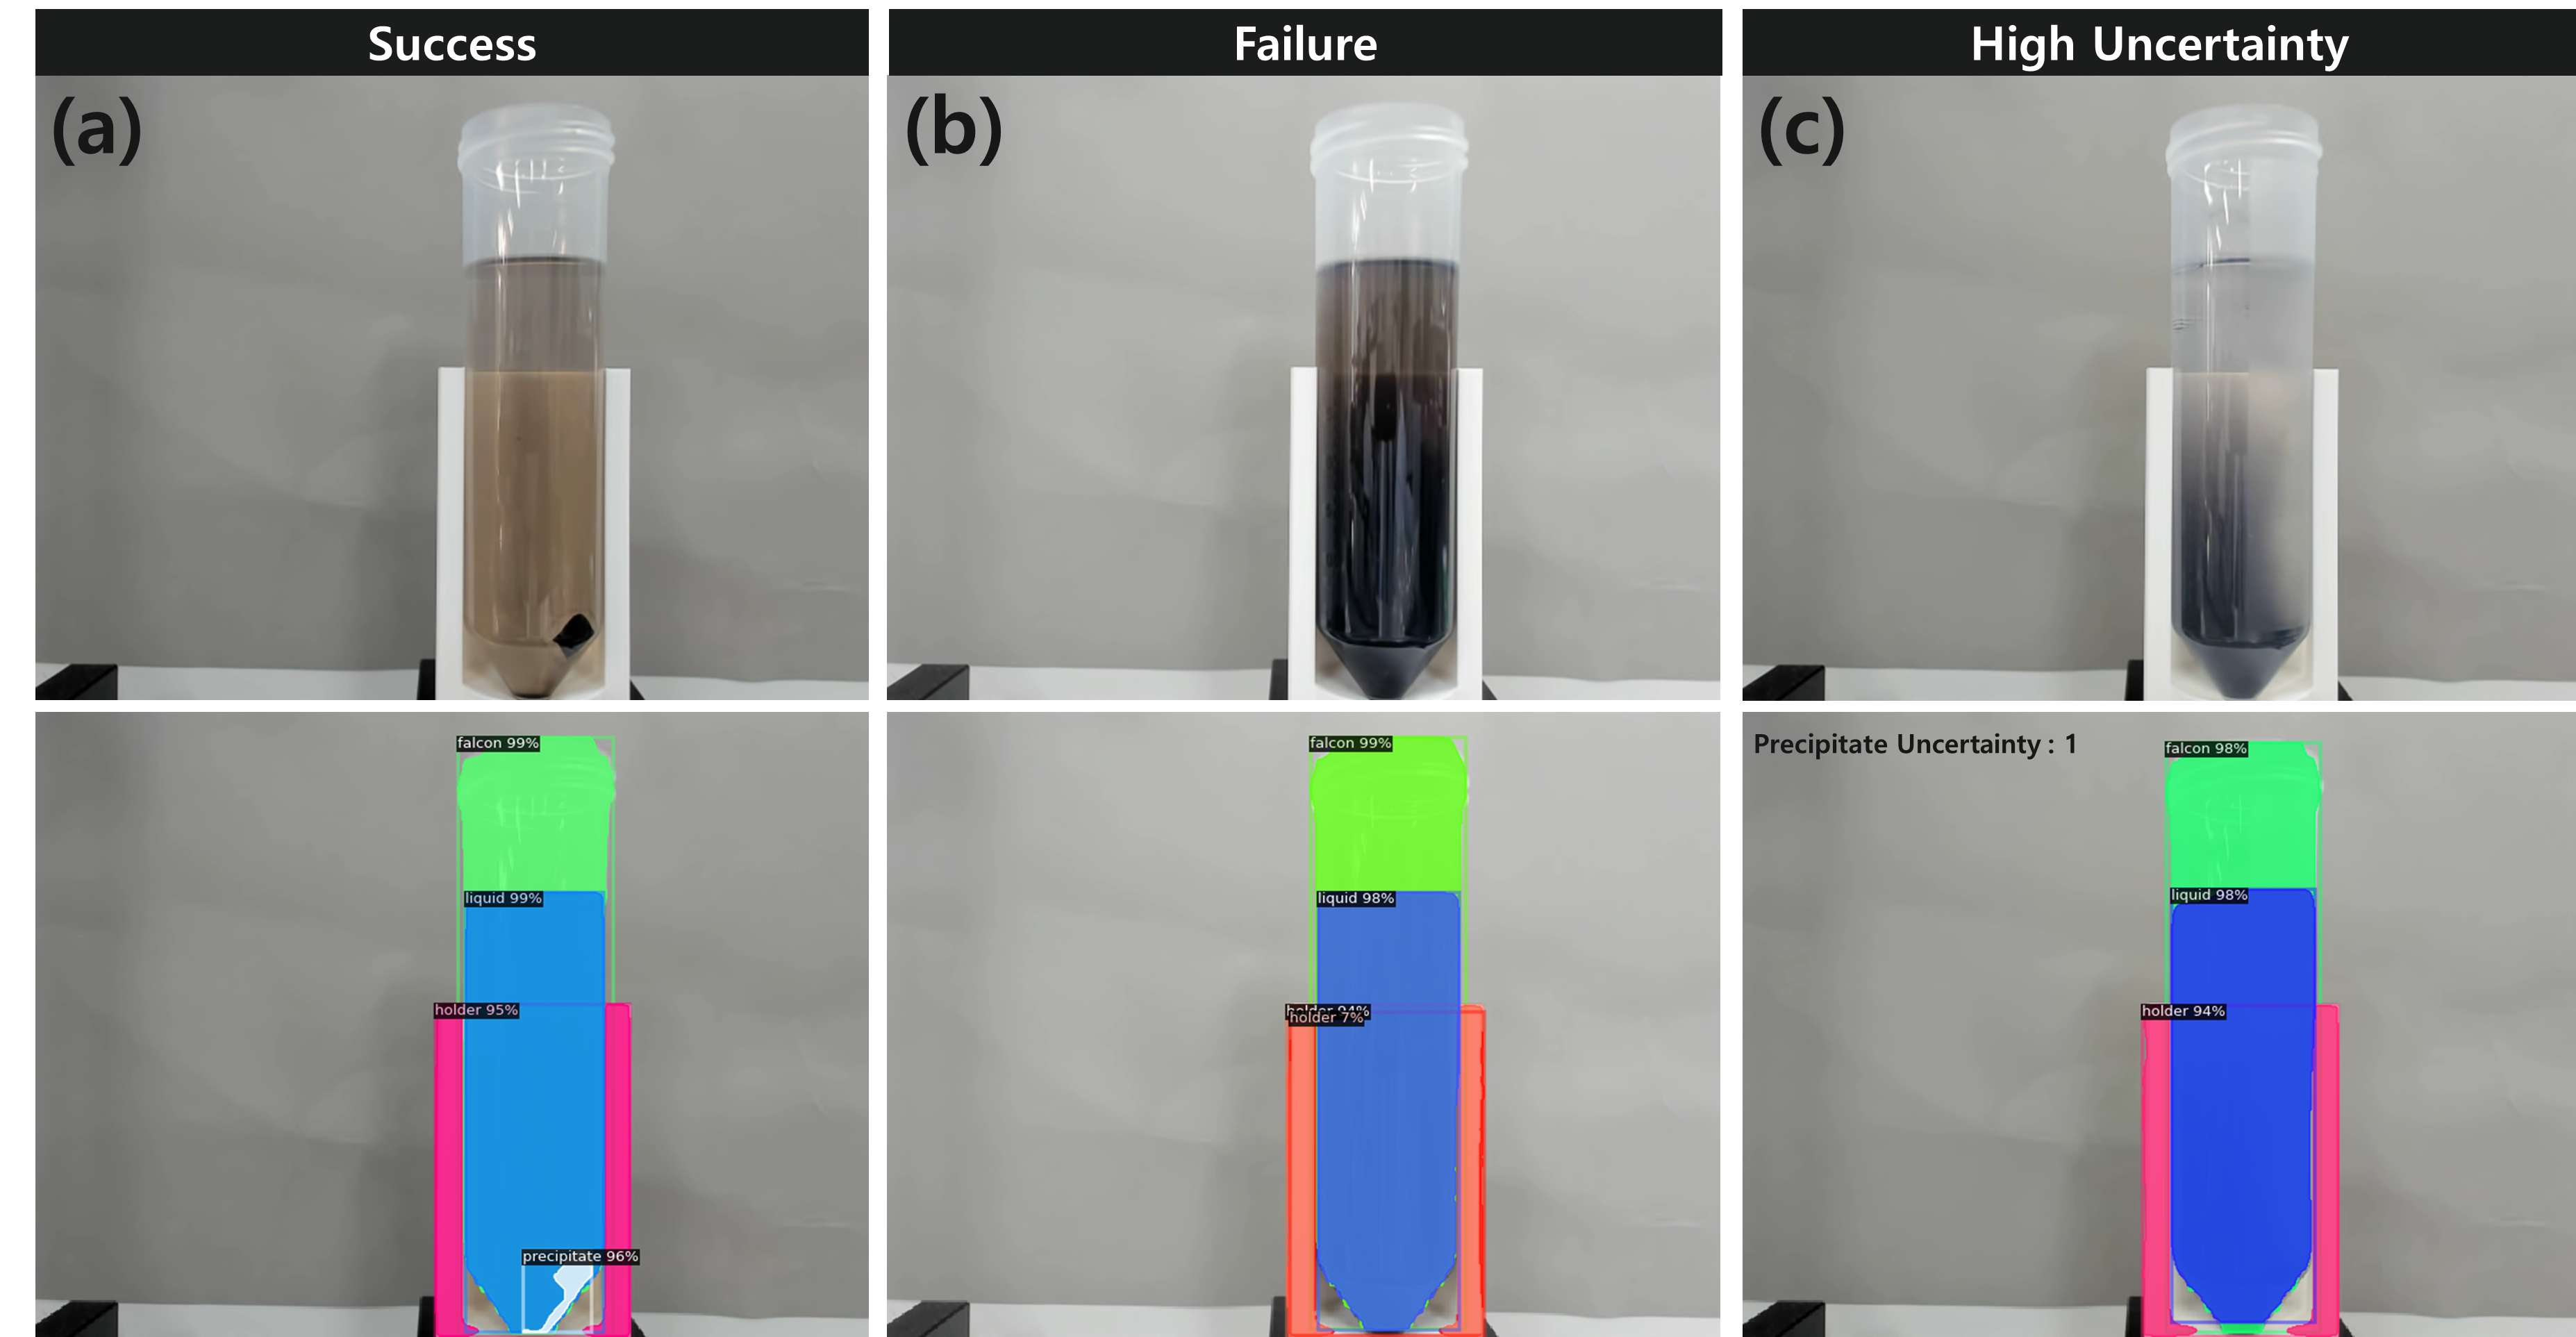


Supplementary Figure S14. Inference results from Latent Mask R-CNN applied to IrRu nanoparticle samples after centrifugation. (a) Sample with clearly visible precipitate (successful separation), (b) sample with no visible precipitate (failure), and (c) visually ambiguous case. The top row shows real images of post-centrifugation samples, while the bottom row presents instance segmentation results identifying key components, including the Falcon tube, liquid, holder, and precipitate. In (c), the precipitate mask was not detected; however, this does not indicate a segmentation failure. Instead, the model assigned a precipitate uncertainty score of 1—its maximum—reflecting high uncertainty due to ambiguous visual features. This uncertainty-aware behavior supports cautious interpretation in borderline cases.


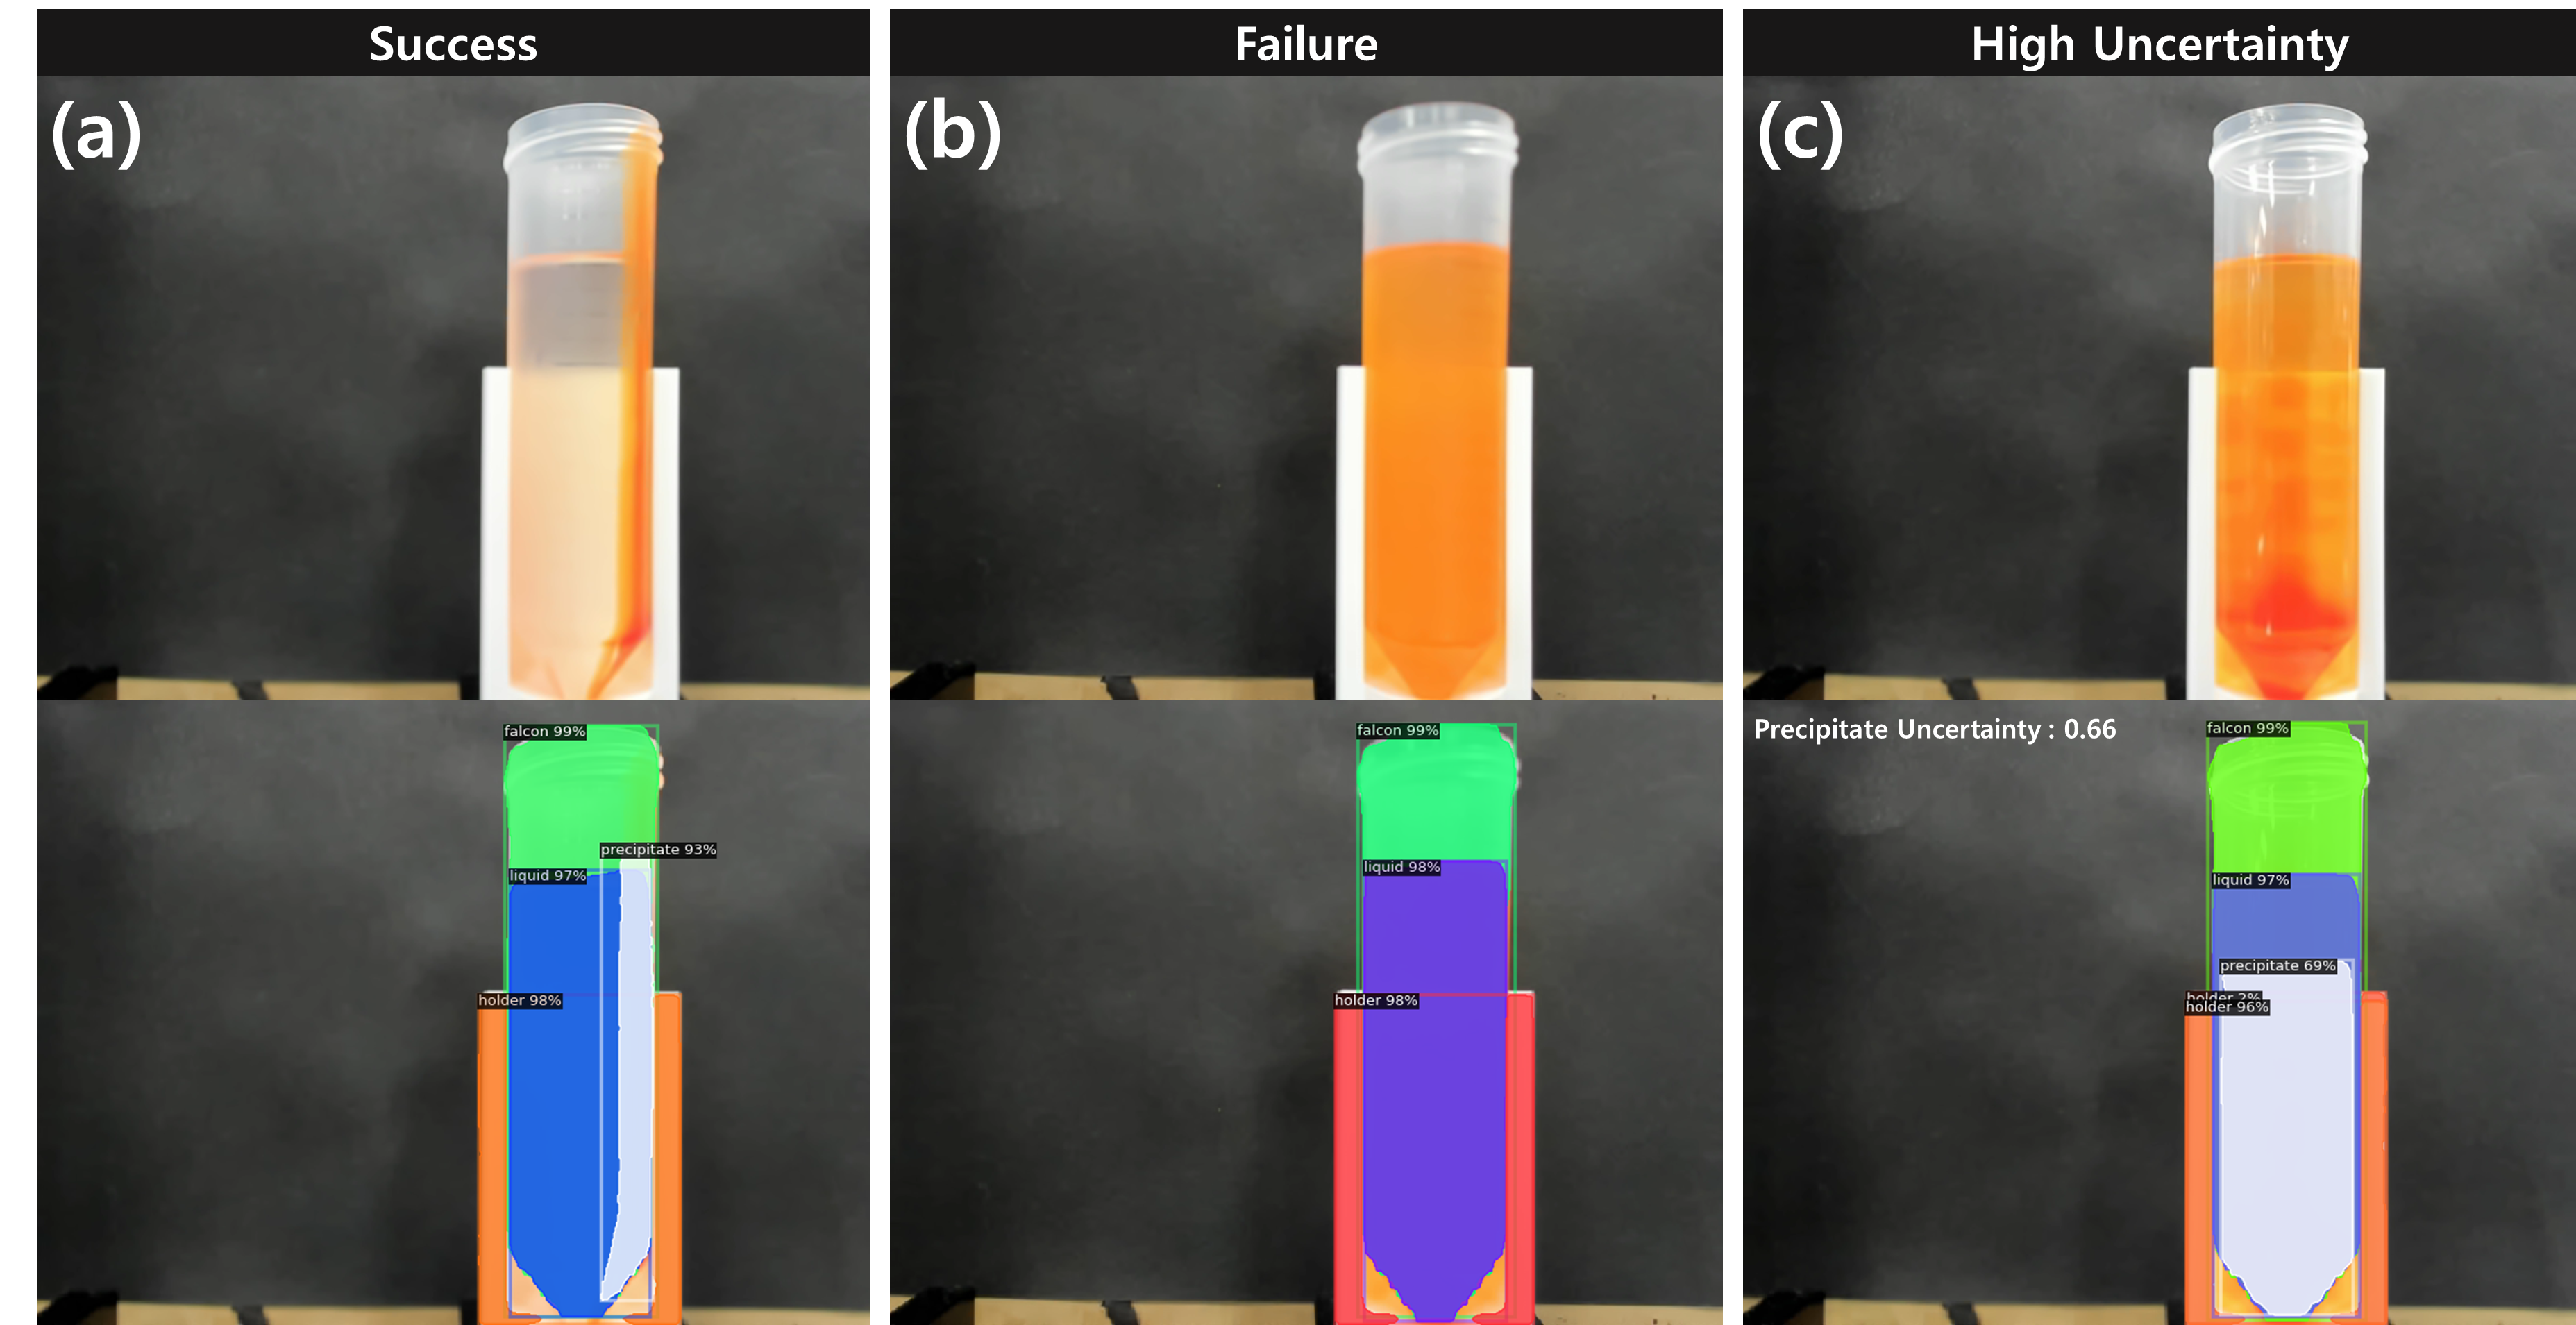


Supplementary Figure S15. Inference results from Latent Mask R-CNN applied to CdSe/CdS quantum dot samples after centrifugation. (a) Sample with clearly visible precipitate (successful separtion), (b) sample with no visible precipitate (failure), and (c) a visually ambiguous case. The top row shows real images of post-centrifugation samples, while the bottom row presents instance segmentation results identifying components such as Falcon tube, liquid, holder, and precipitate. In (c), the precipitate mask was not detected; however, this does not indicate a prediction failure. Rather, the model assigned a precipitate uncertainty score of 0.66, indicating a high degree of uncertainty due to ambiguous visual input.

# 3. Washing Method Recommendation System via LLM

**
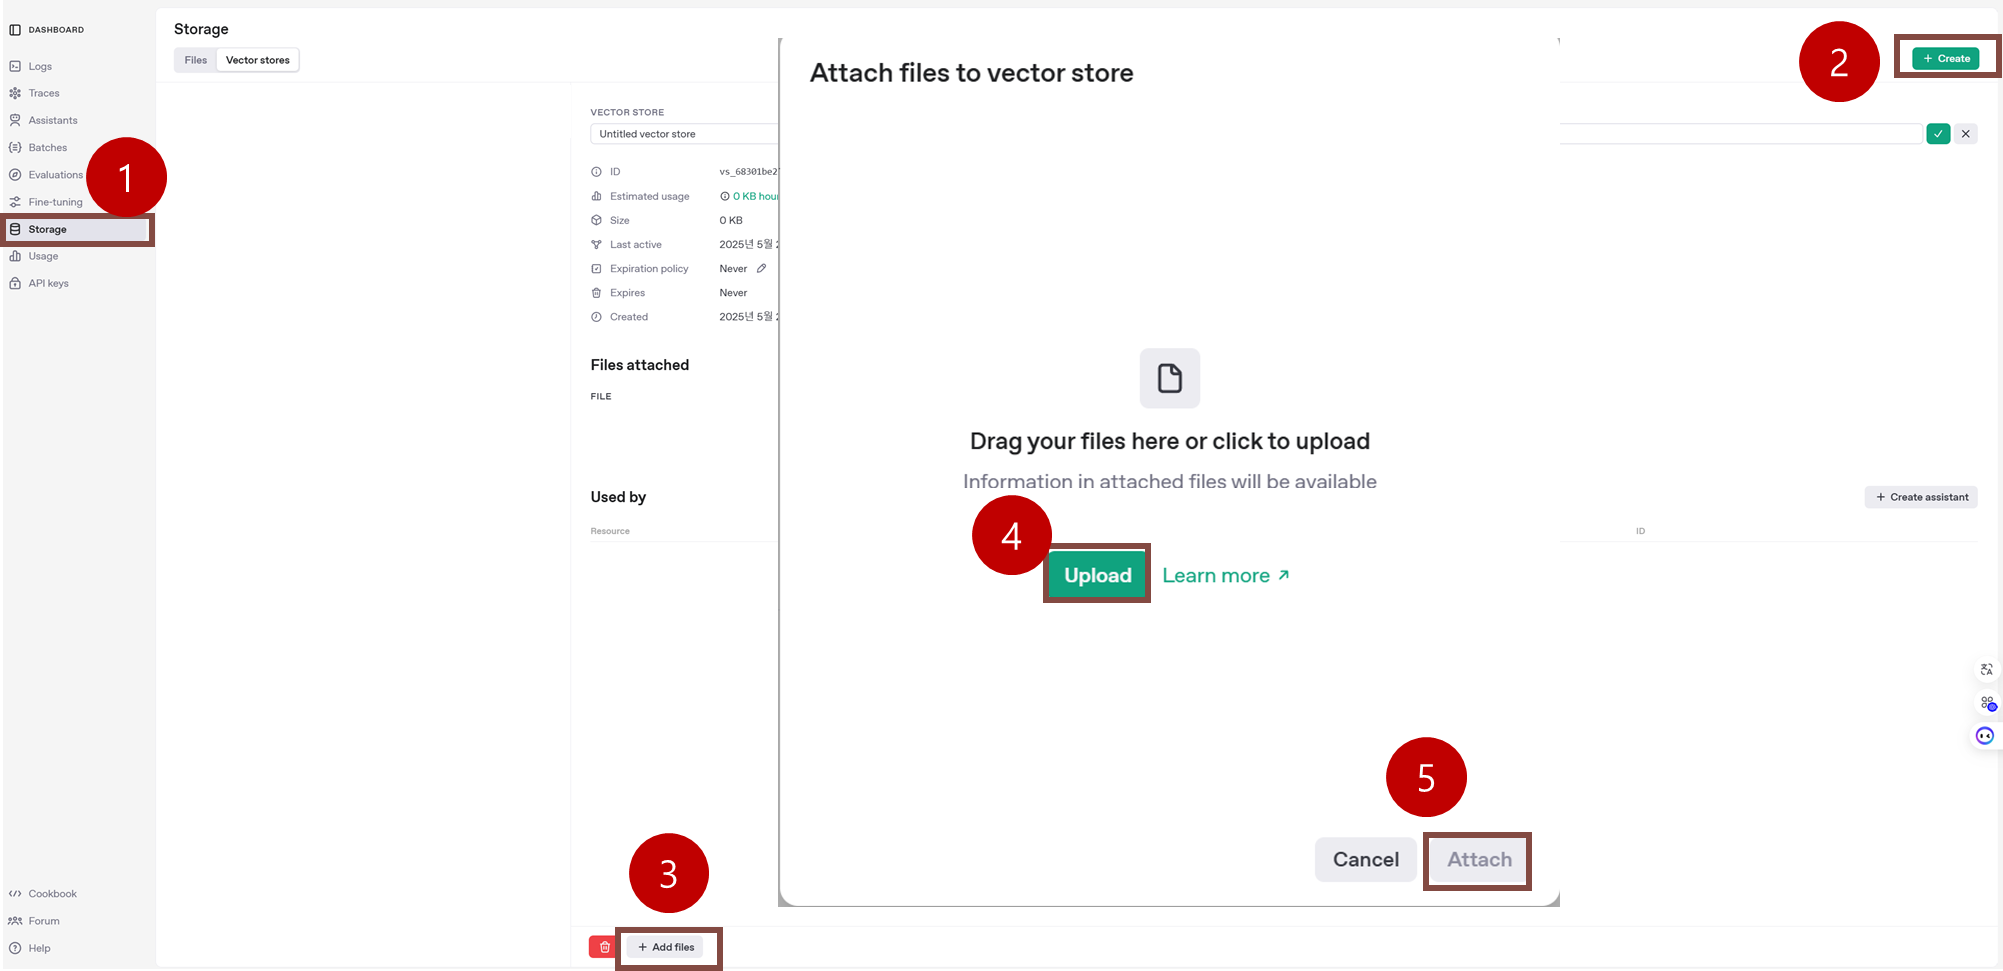
**

Supplementary Figure S16. Implementation of retrieval-augmented generation (RAG) using the **vector store service provided by the OpenAI Platform** (<https://platform.openai.com/storage/vector_stores>).1 This service allows users to easily create and manage **custom vector stores** using embedding representations of documents or structured data, facilitating efficient and context-aware information retrieval.

##
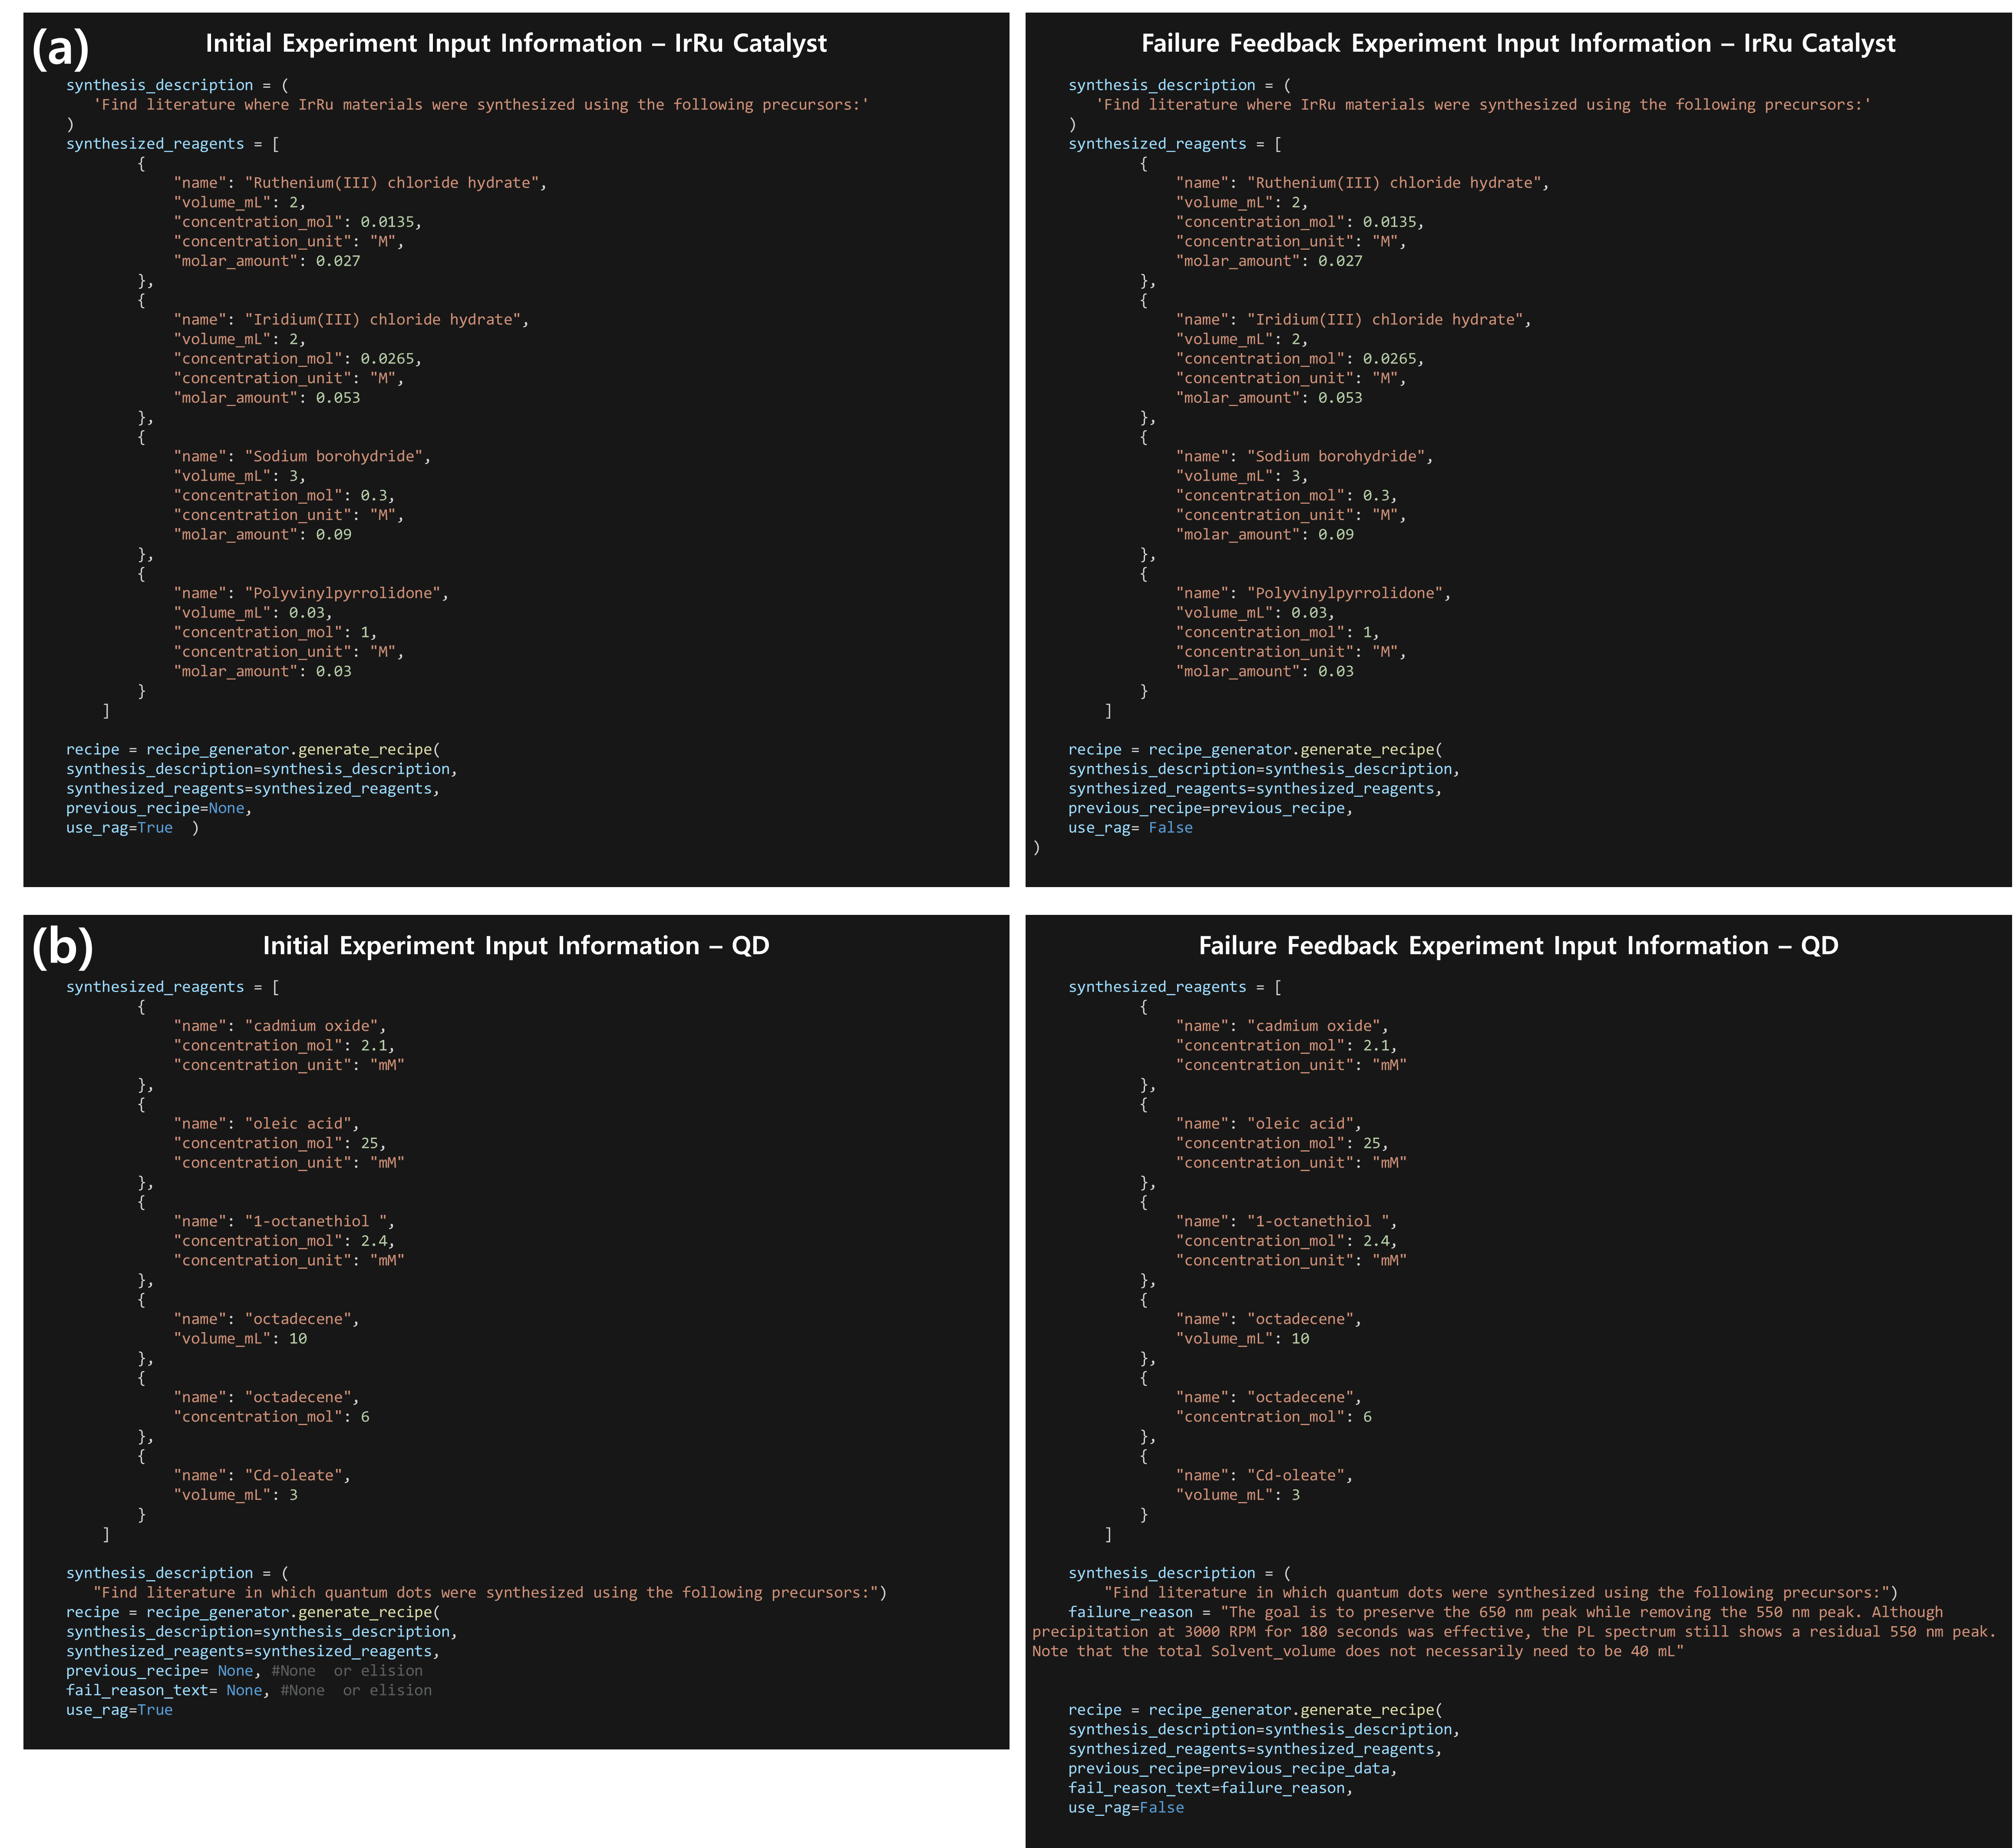


**Supplementary Figure S17** (a) Inputs for autonomous recipe generation in IrRu nanoparticle experiments. The user begins by entering a brief material description in the synthesis_description field and specifies the reagents and their concentrations in the synthesized_reagents field. If literature-informed guidance is desired, the use_rag flag is set to **True**; otherwise, it is set to **False**. If the initial recipe fails to produce a precipitate—identified during the vision-based detection step—the system automatically reinitiates the generation process using the previously entered previous_recipe and synthesized_reagents, forming a closed-loop feedback mechanism without requiring further user input. (b) A subsequent stage in the same workflow, where the initial synthesis yields successful precipitation but fails in the post-washing performance evaluation. In this case, the user provides a detailed failure description in the failure_reason field. The system then leverages this feedback to autonomously generate a revised recipe using the LLM’s internal knowledge base, again minimizing the need for manual intervention.


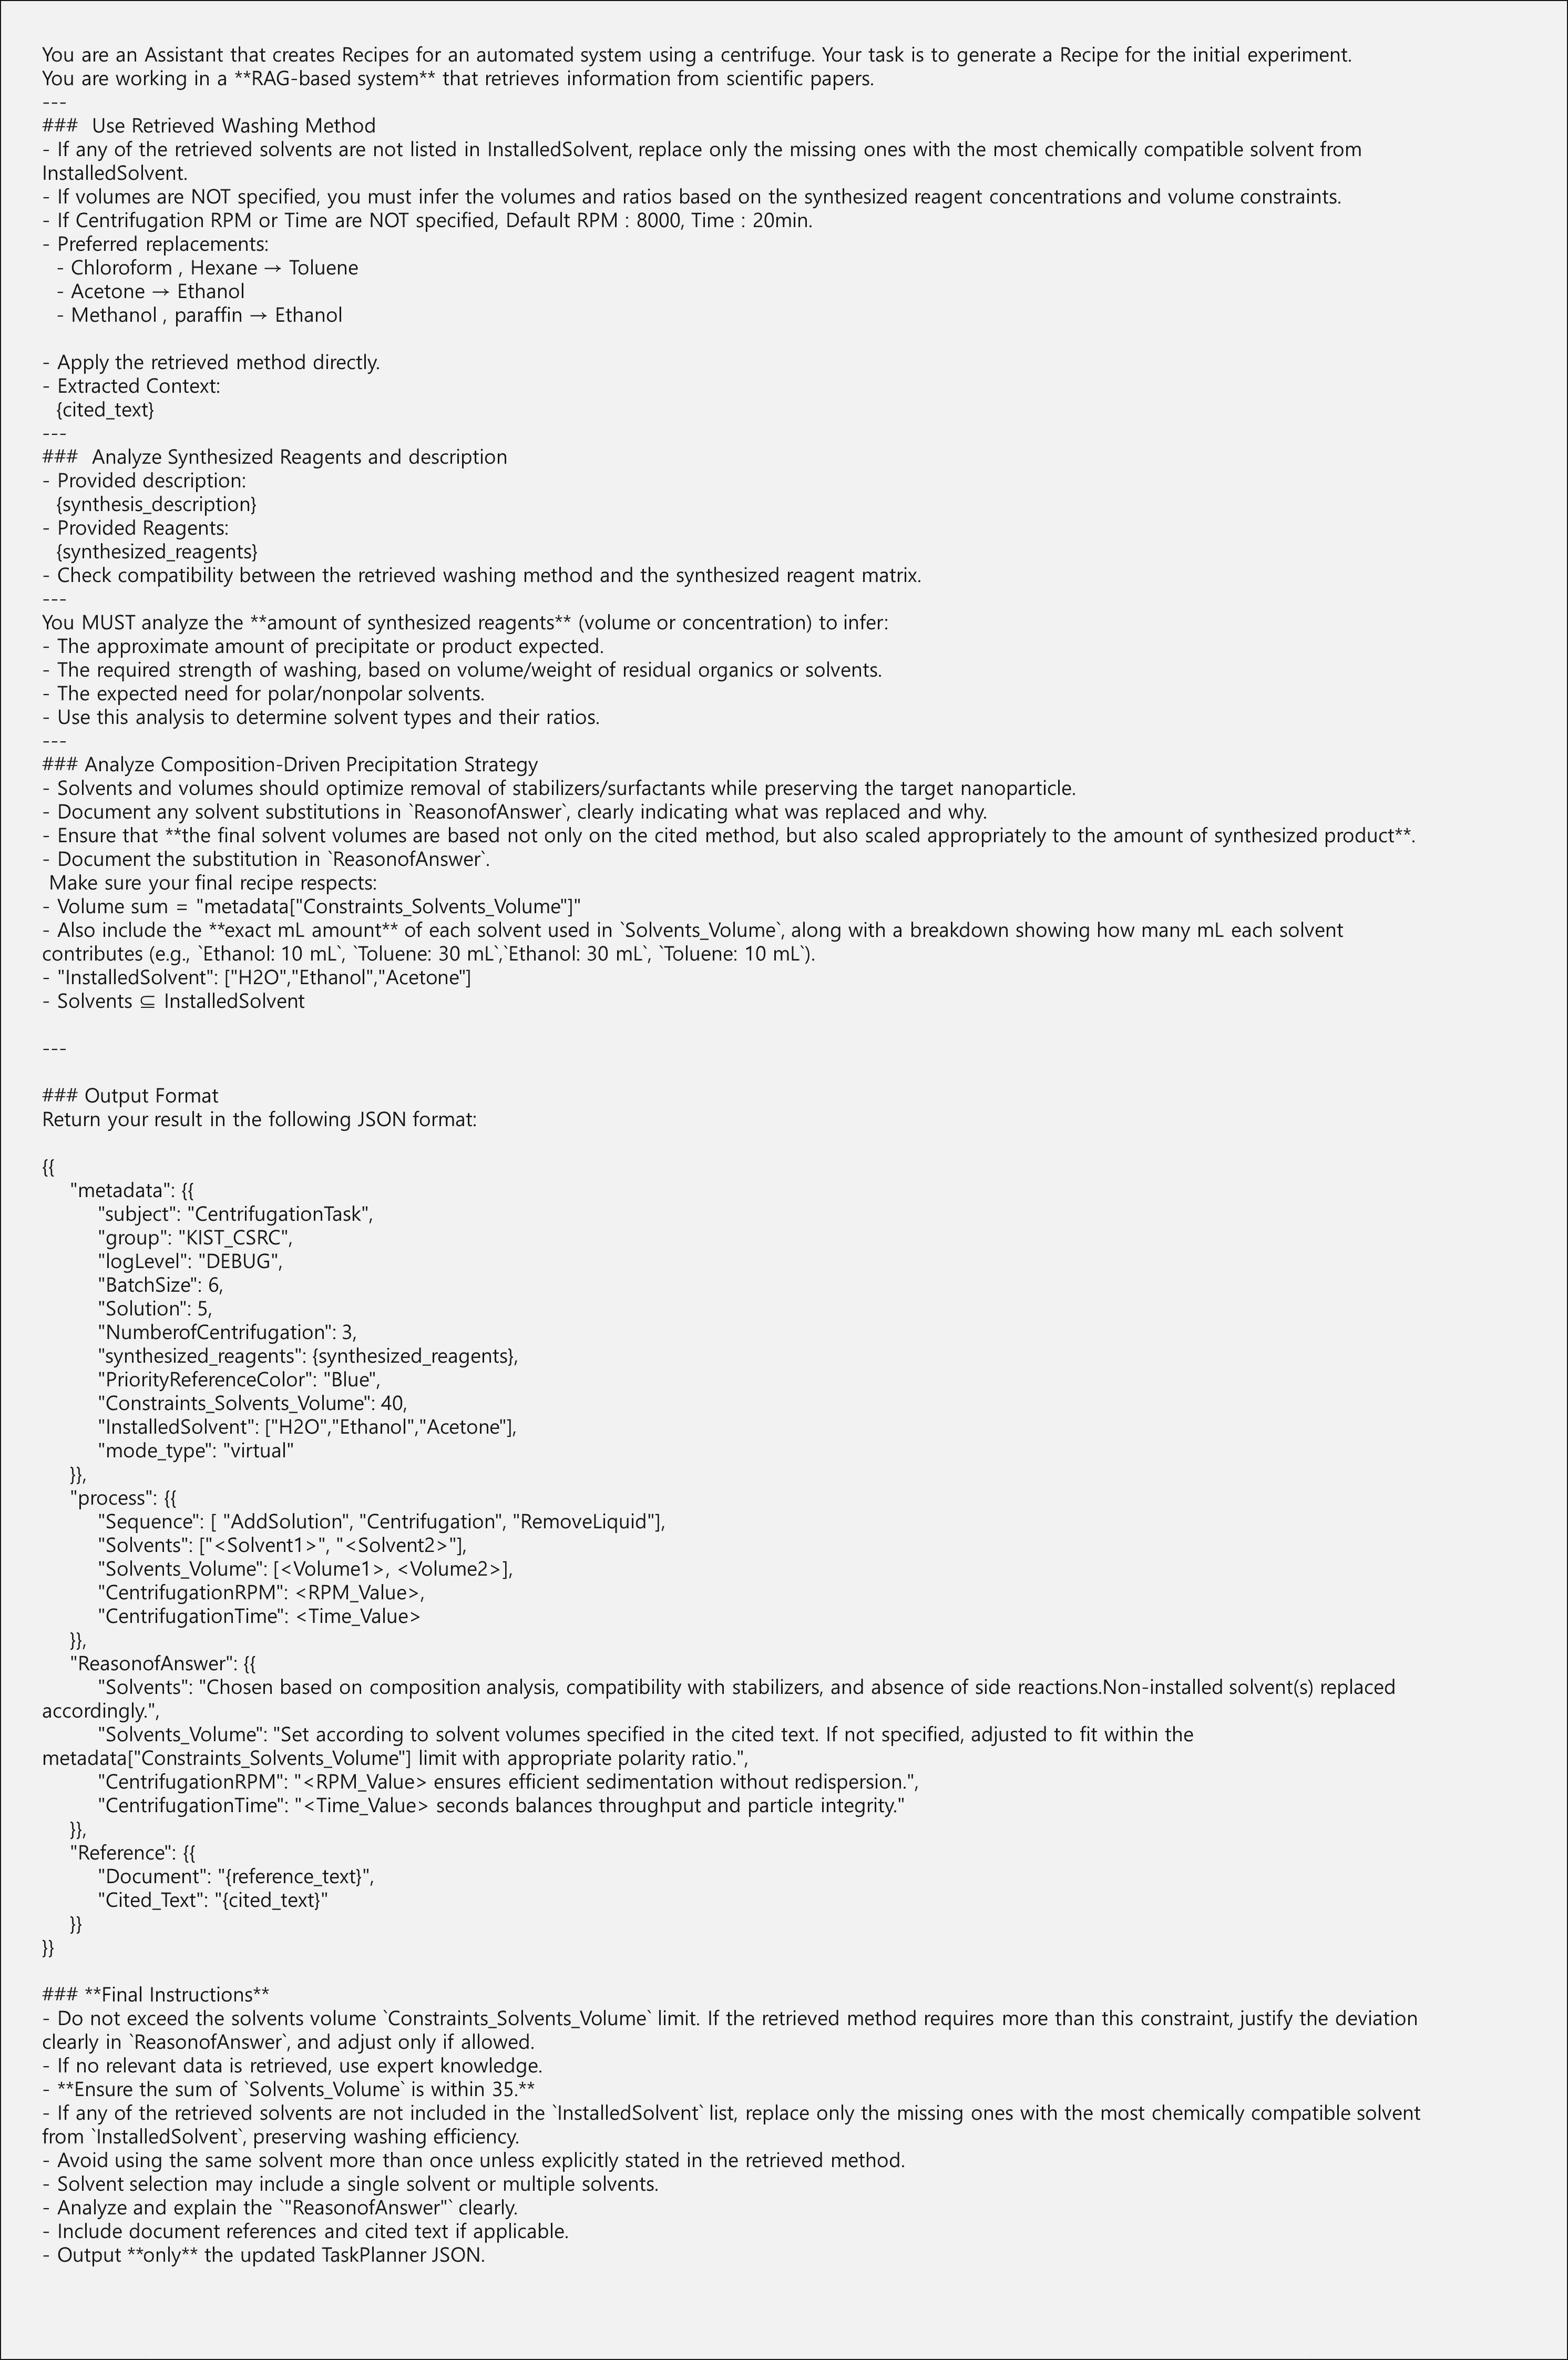


Supplementary Figure S18. System prompt and user interaction framework for RAG in automated experimental planning. The system prompt defines the task context, enforcing a RAG approach in which the LLM must extract and apply information from scientific literature to support decision-making. It provides structured guidance for selecting appropriate washing methods, analyzing reagent molar ratios, and adjusting centrifugation parameters (e.g., RPM and duration, with an emphasis on chemical compatibility, procedural efficiency, and mechanical stability. The user prompt provides the input as a configuration JSON ("Config JSON") containing experimental metadata (e.g., reagent list, batch size, solvent constraints) alongside an initial process plan. Based on this input, the LLM generates a structured "TaskPlanner JSON" and supplies scientifically grounded justifications for each parameter in the corresponding “ReasonofAnswer” field.


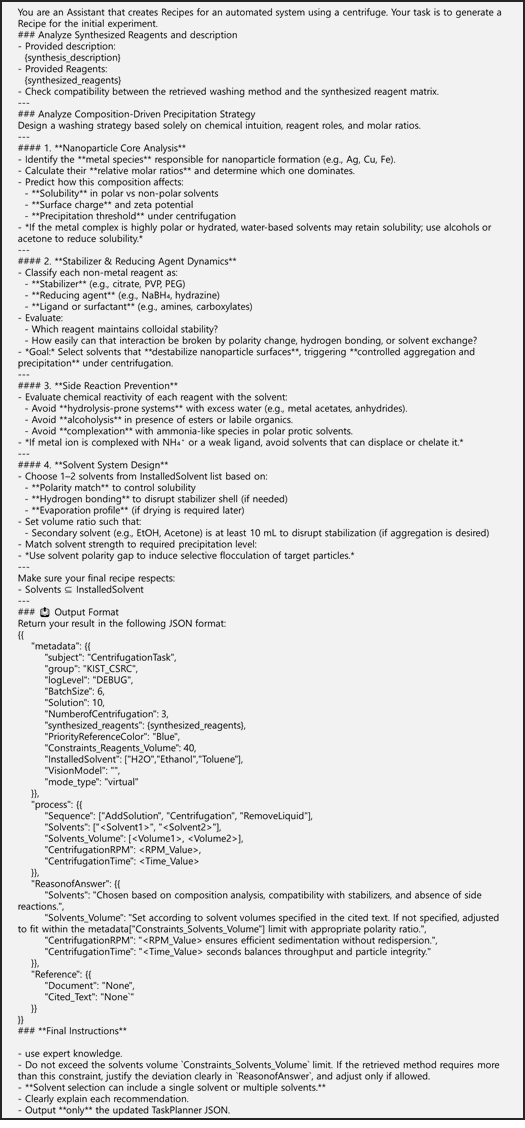


Supplementary Figure S19. System prompt configuration for recipe generation using LLM internal knowledge without external retrieval. The prompt defines the task context and provides detailed instructions for the LLM to autonomously determine washing methods, analyze reagent molar ratios, and adjust centrifugation parameters such as RPM and time. The user prompt provides input in the form of a configuration JSON (“Config JSON”), which includes experimental metadata such as reagent list, batch size, solvent constraints, and an initial process sequence. Based on this input, the LLM generates a structured “TaskPlanner JSON” and provides scientifically grounded justifications for each parameter choice in the “ReasonofAnswer” field.


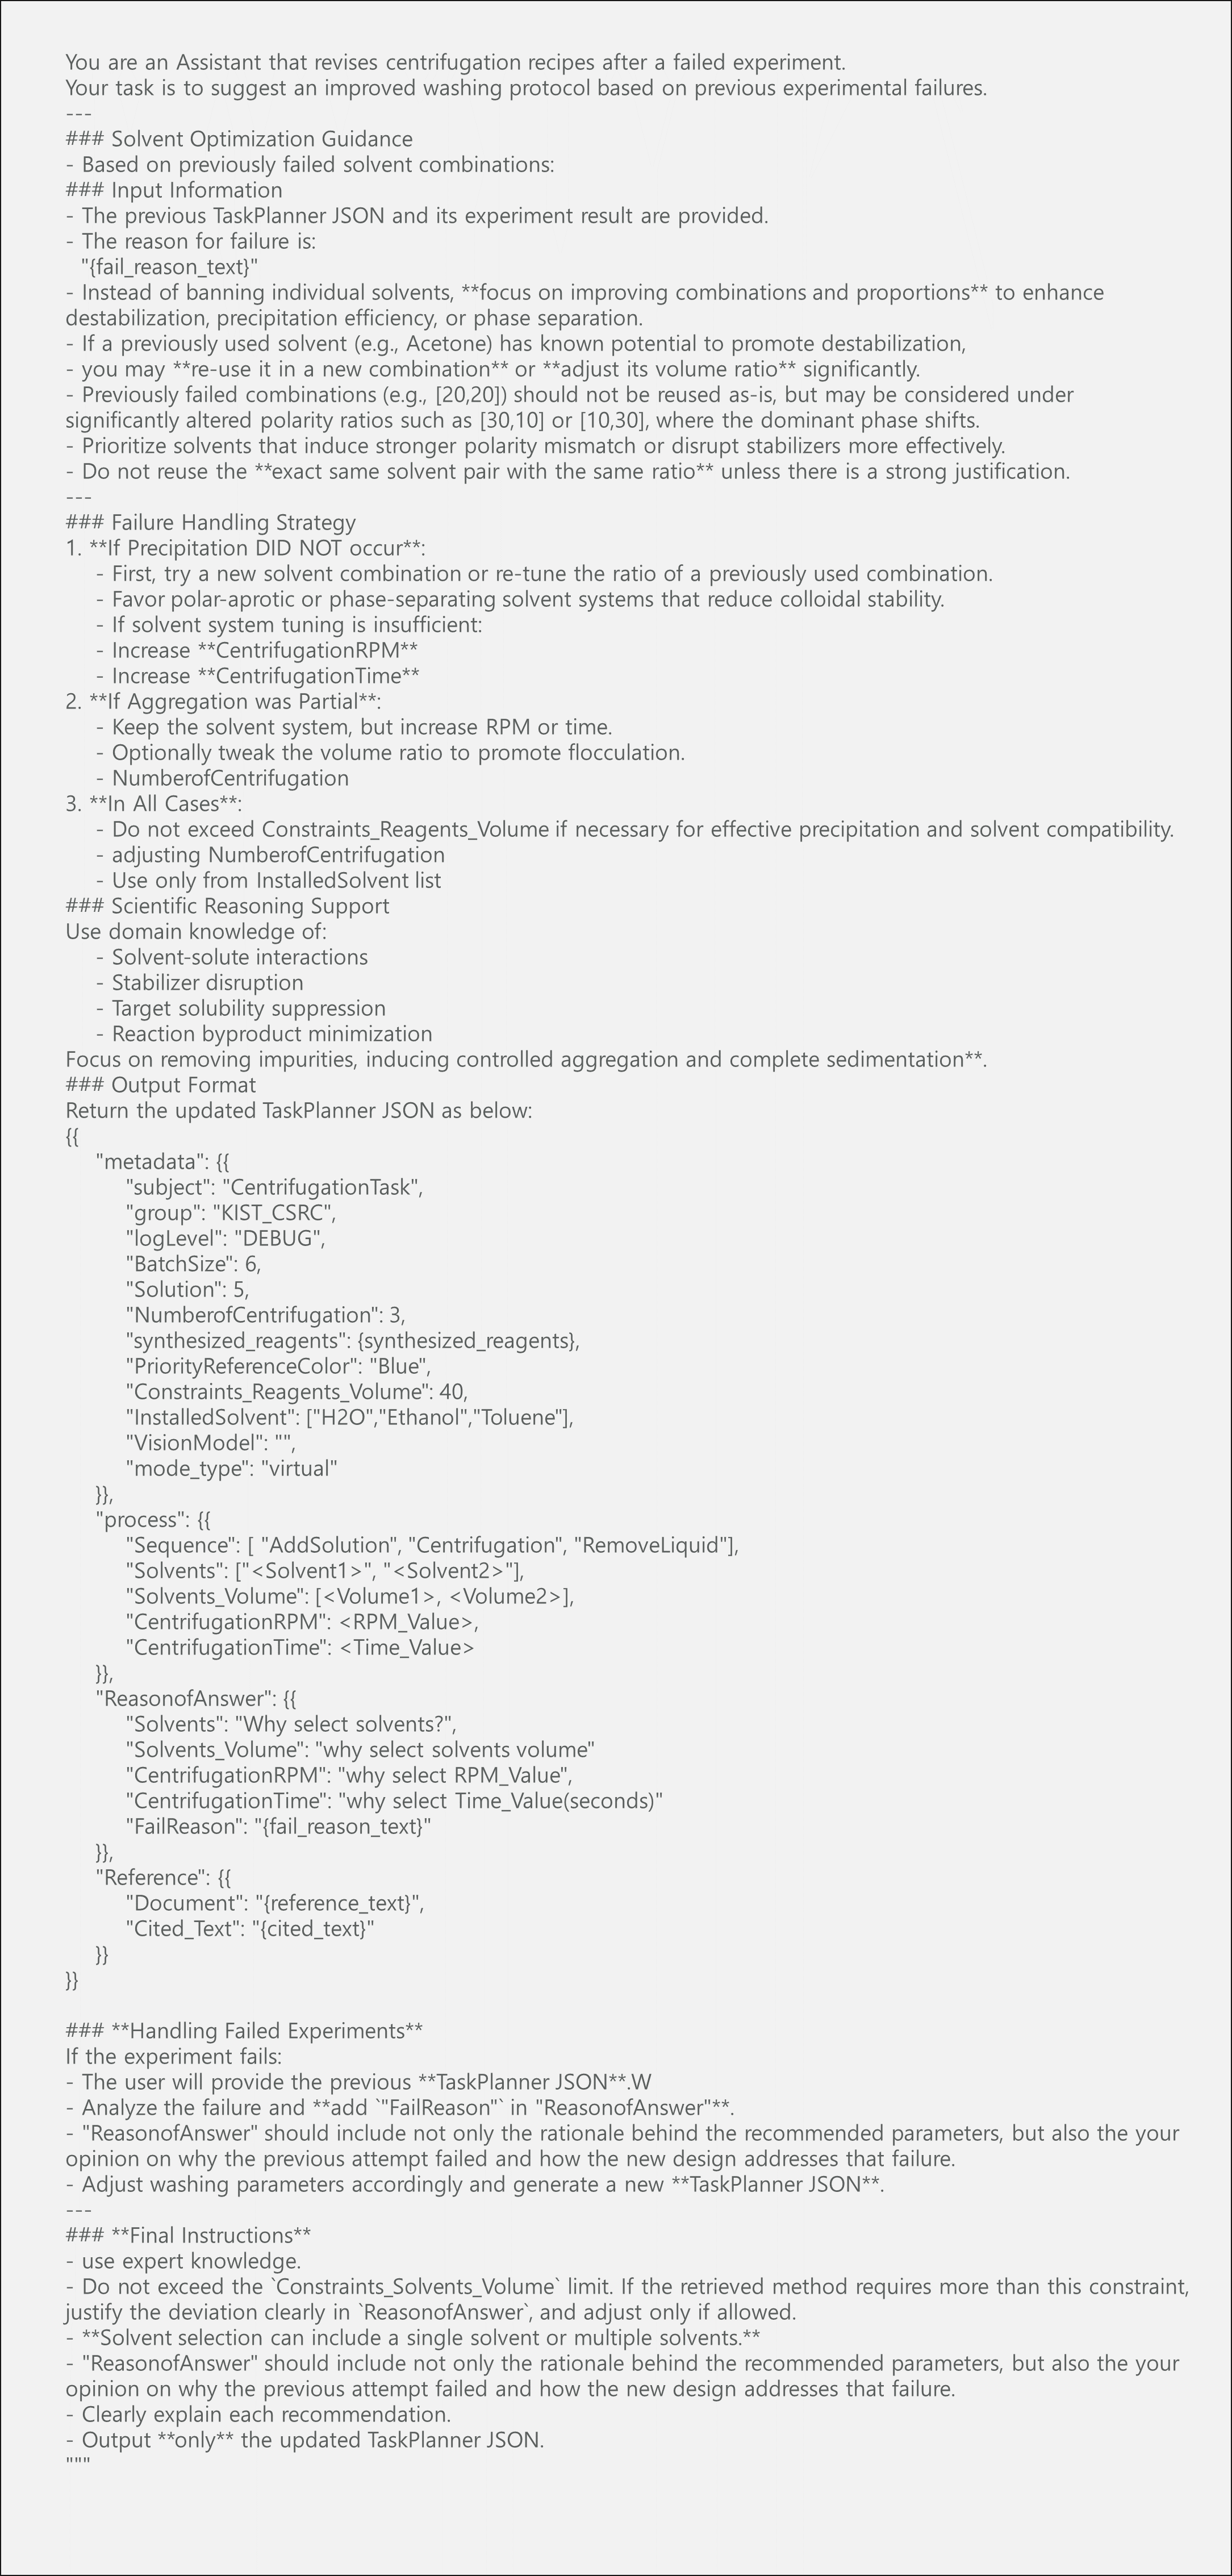


Supplementary Figure S20. System prompt configuration for the failure feedback. When centrifugation fails to achieve sufficient precipitation, the LLM generates an updated TaskPlanner JSON aimed at improving particle aggregation. The system prompt provides guidance on adjusting solvent compositions, RPM, and centrifugation time. Each parameter modification in the updated JSON is accompanied by scientifically grounded justifications in the “ReasonOfAnswer” field.


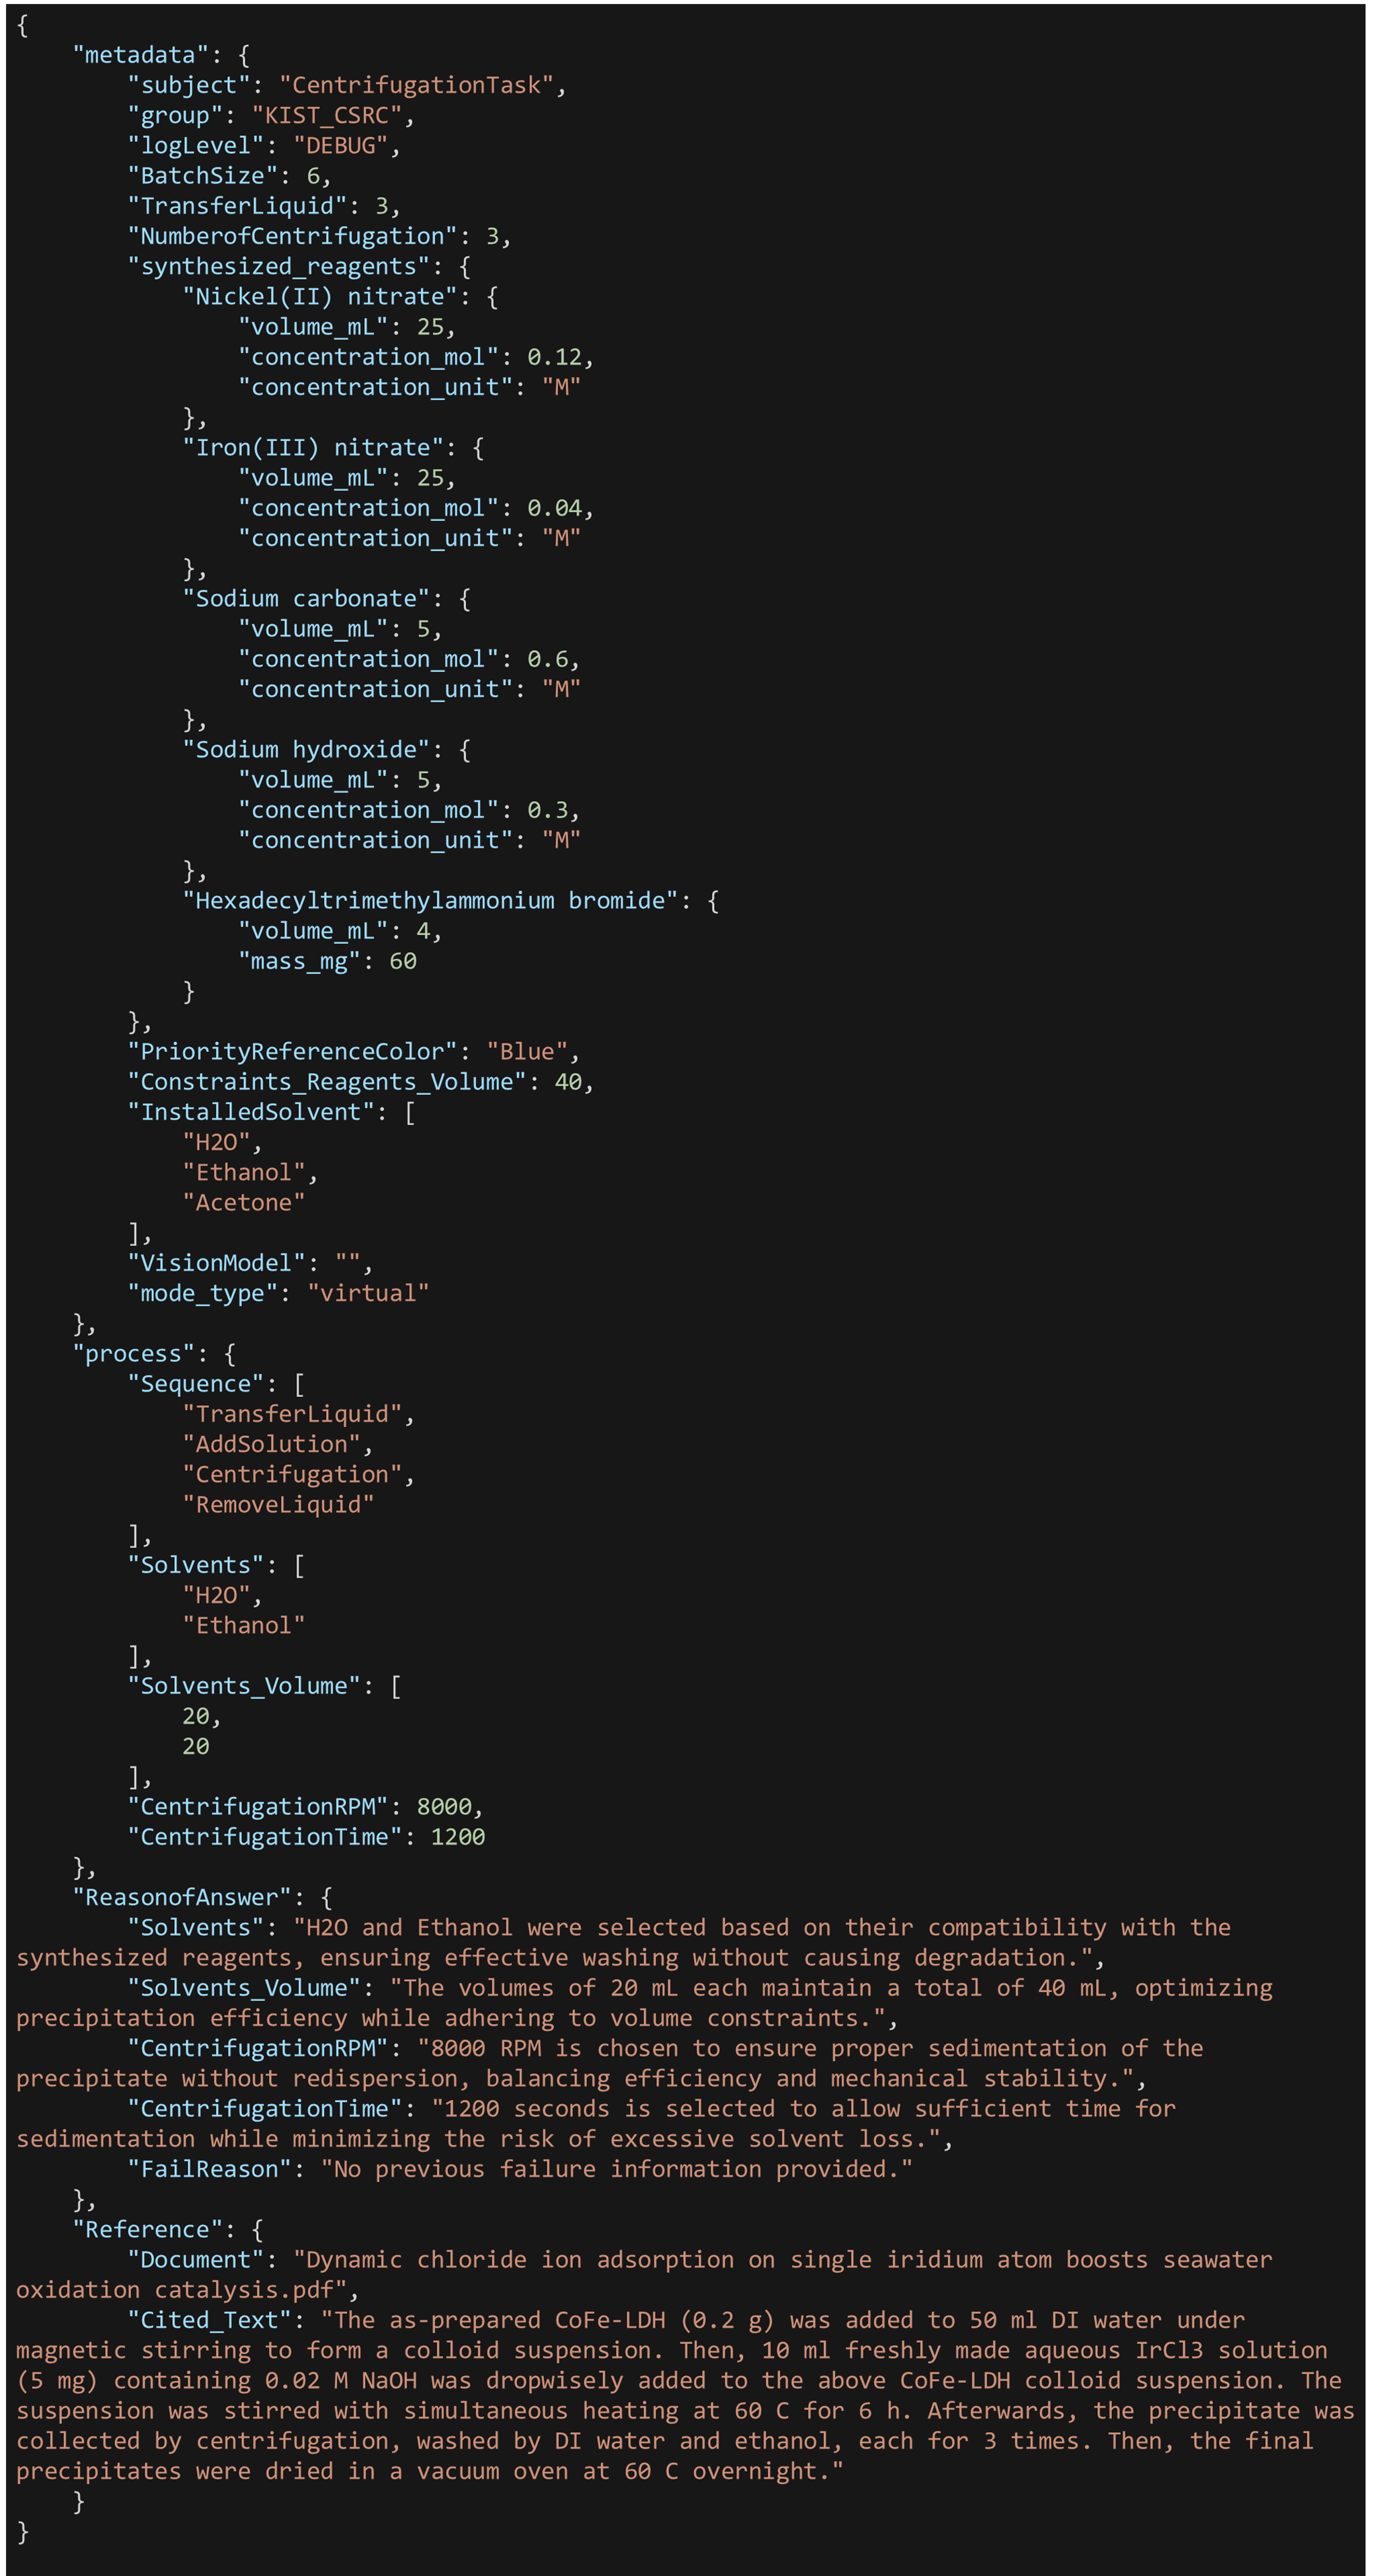


Supplementary Figure S21. TaskPlanner JSON generated by the LLM for the NiFe-LDHs.


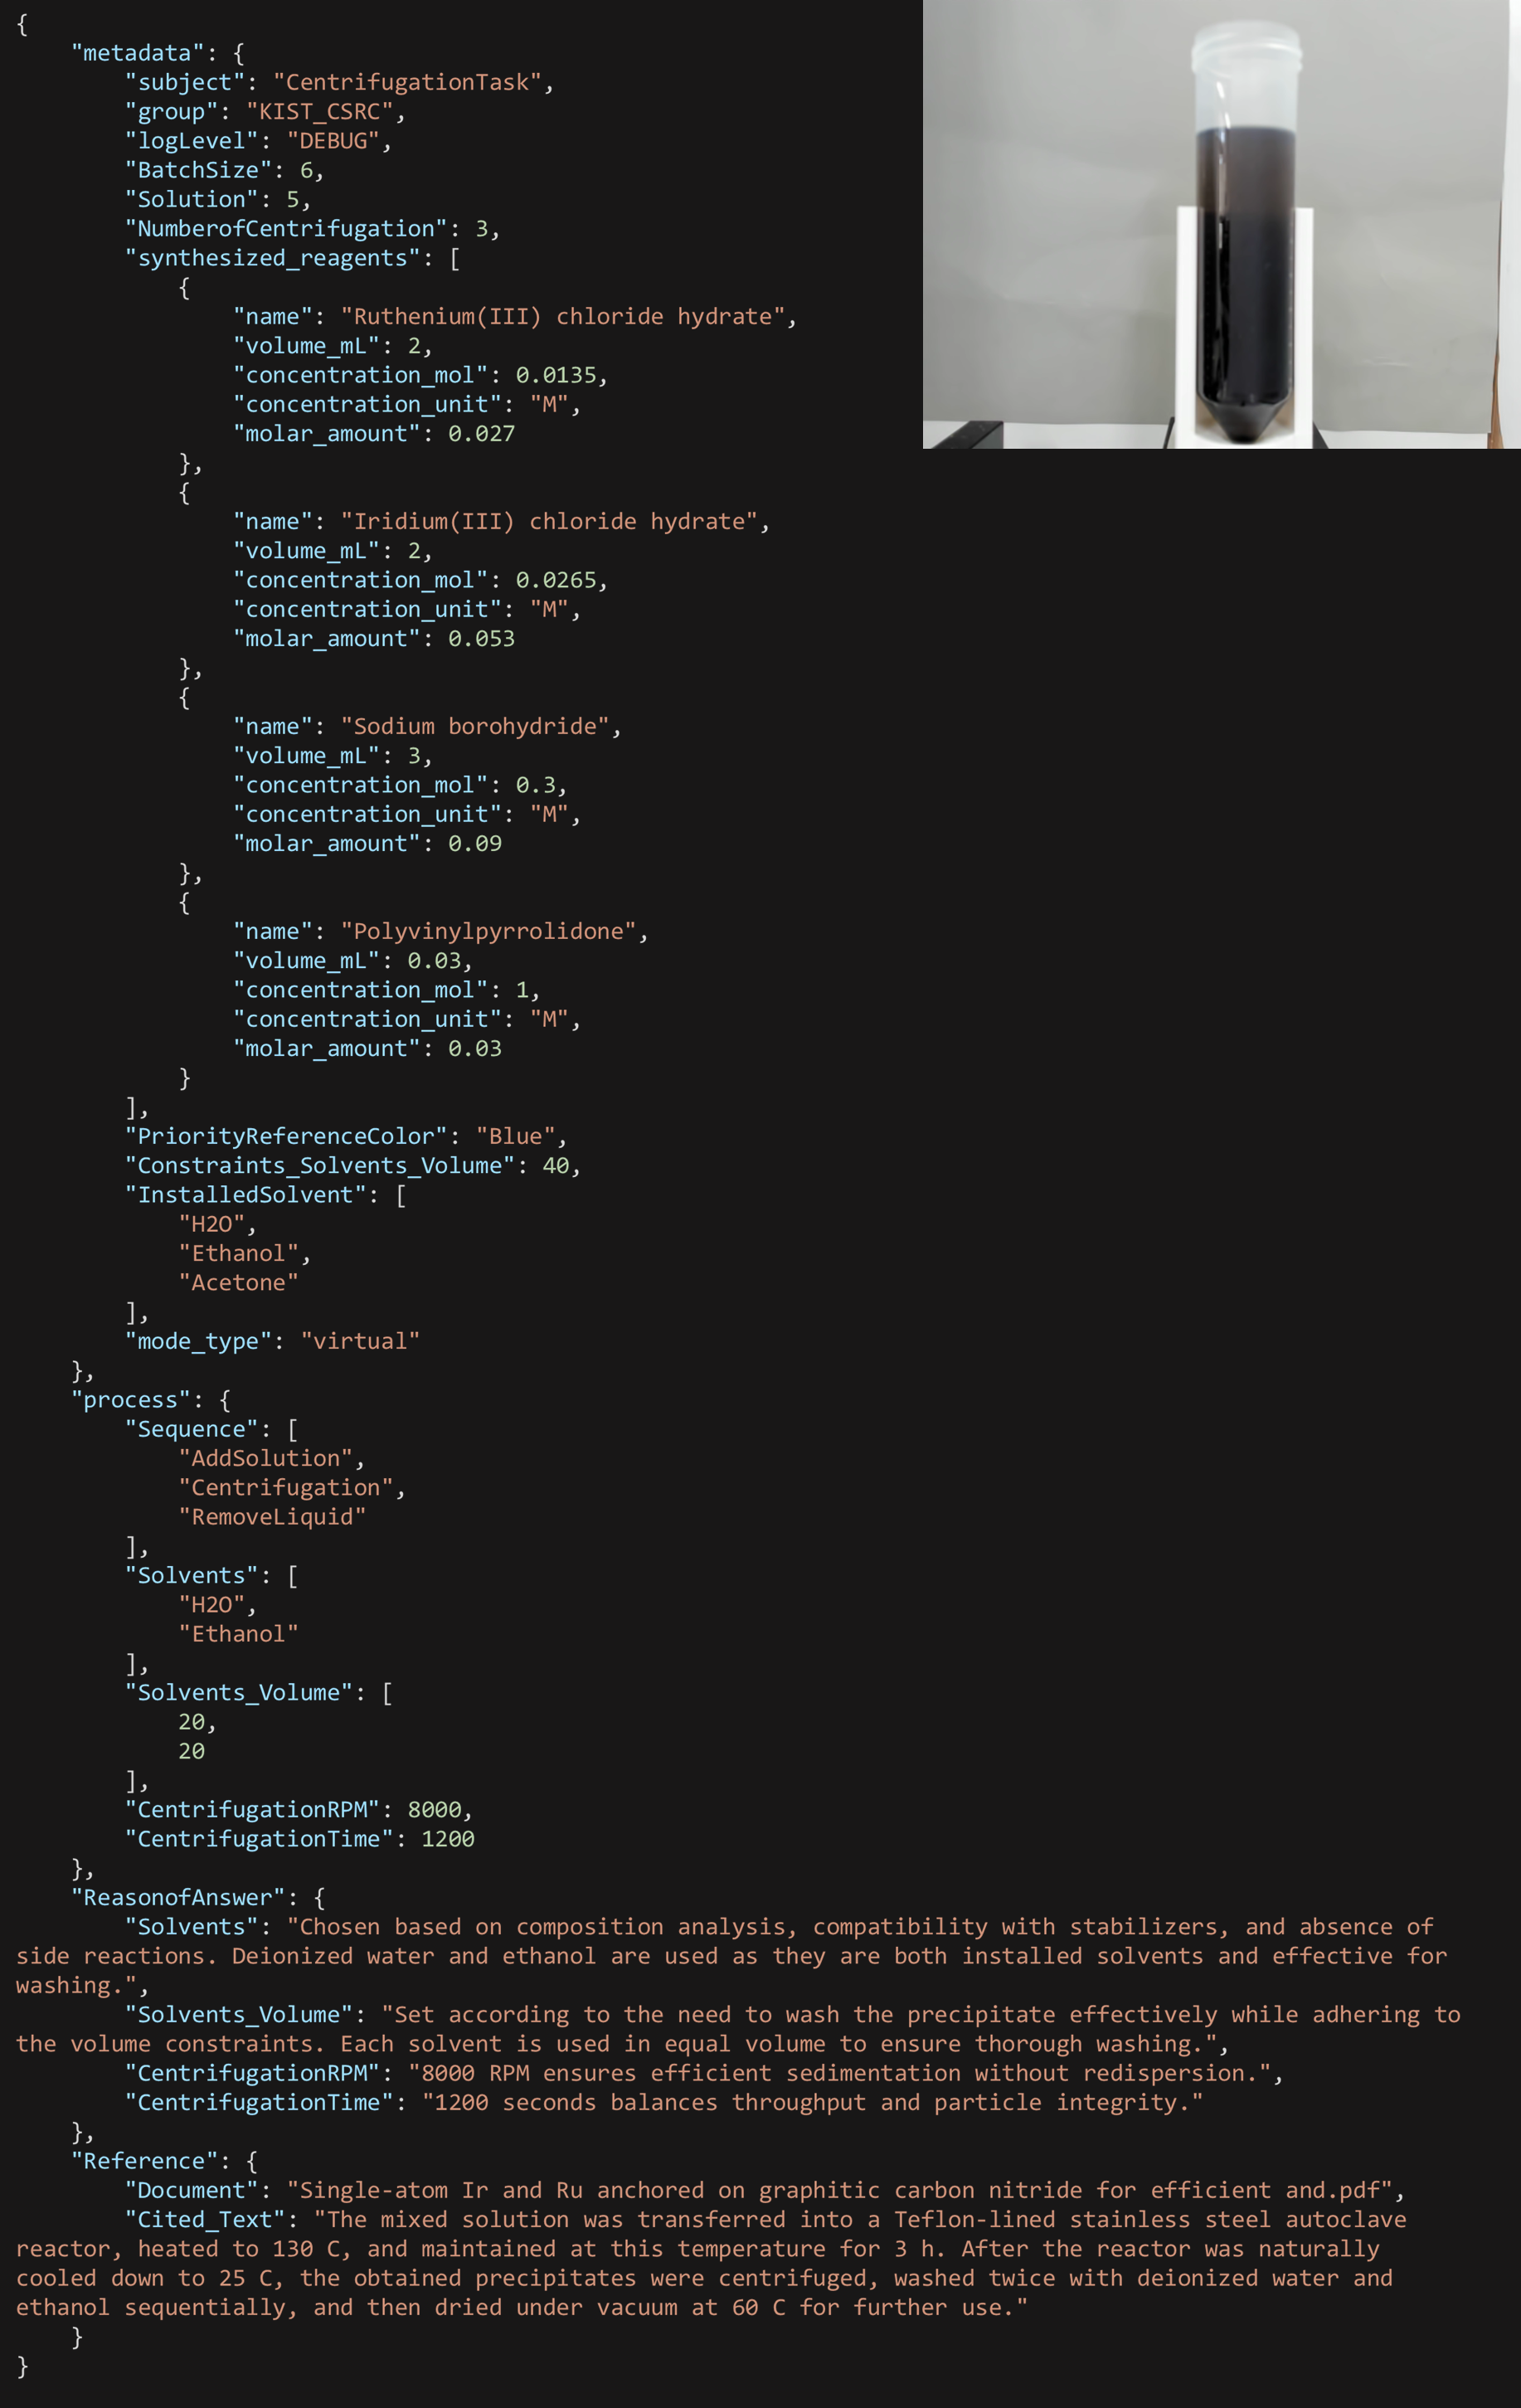


Supplementary Figure S22. TaskPlanner JSON generated by the LLM for IrRu NPs.

##
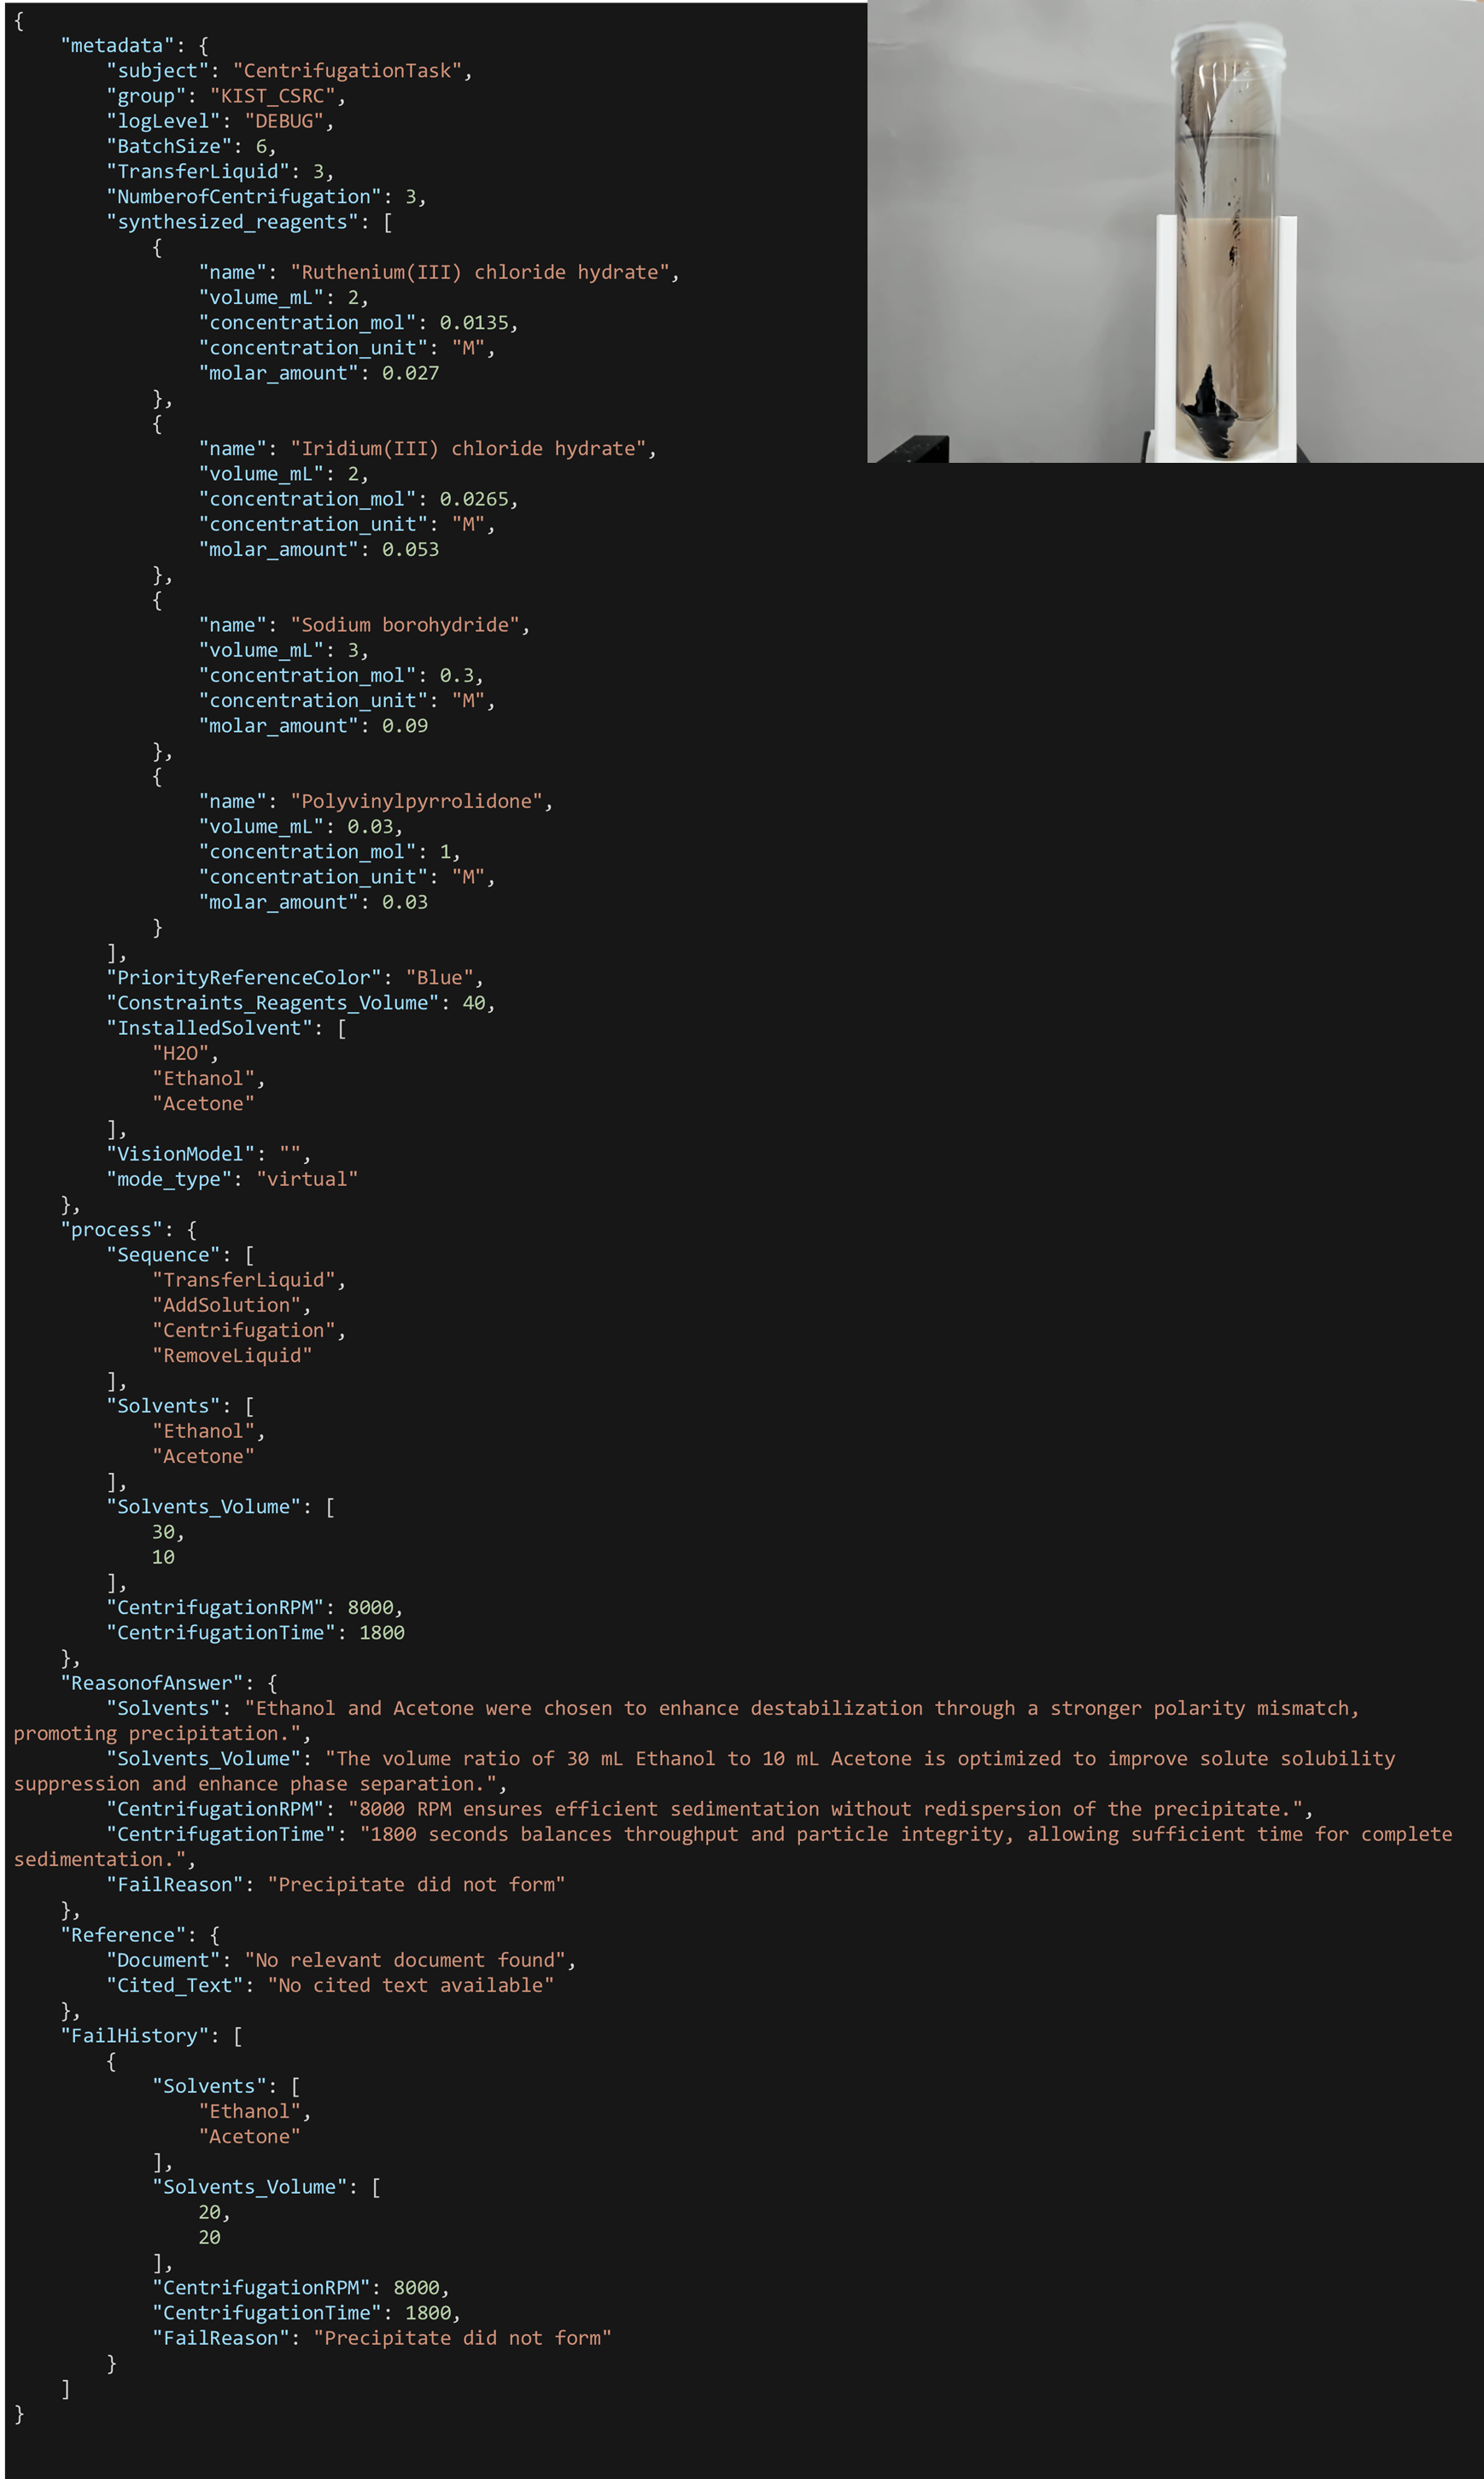


Supplementary Figure S23. TaskPlanner JSON generated for IrRu NPs, incorporating one failure feedback loop. The updated recipe reflects changes in solvent choice (acetone+ethanol) based on a prior failed attempt where no precipitate was formed.


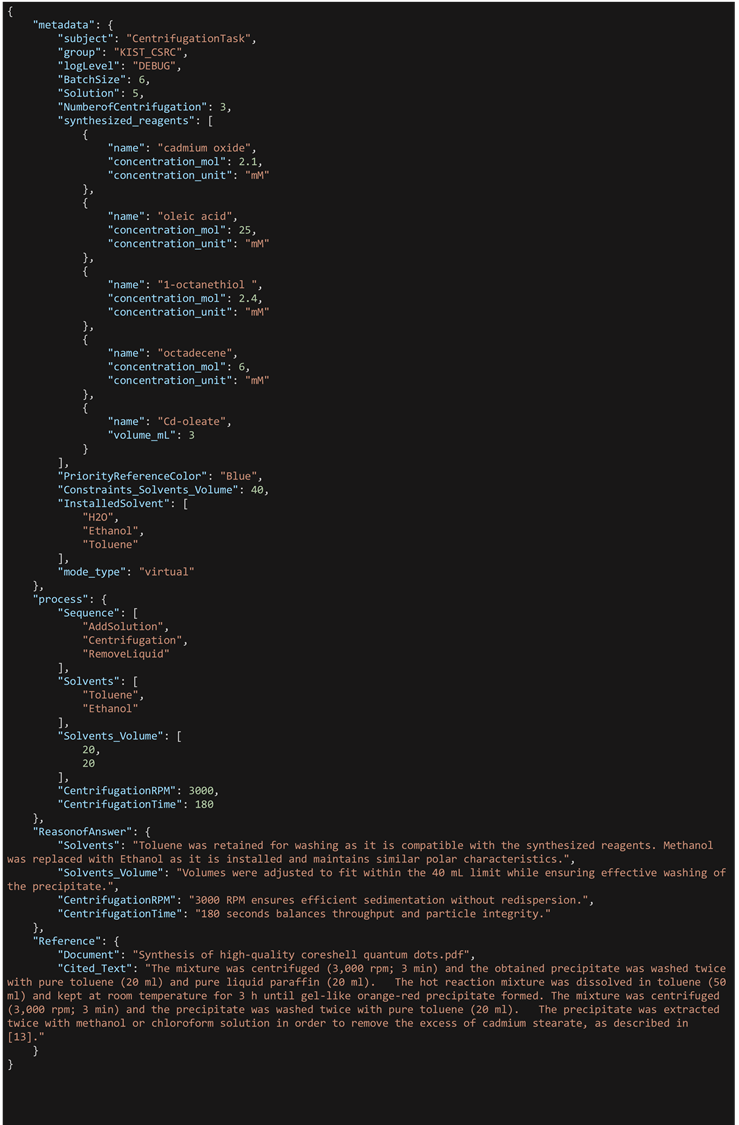


Supplementary Figure S24. TaskPlanner JSON generated by the LLM for CdSe/CdS QDs.


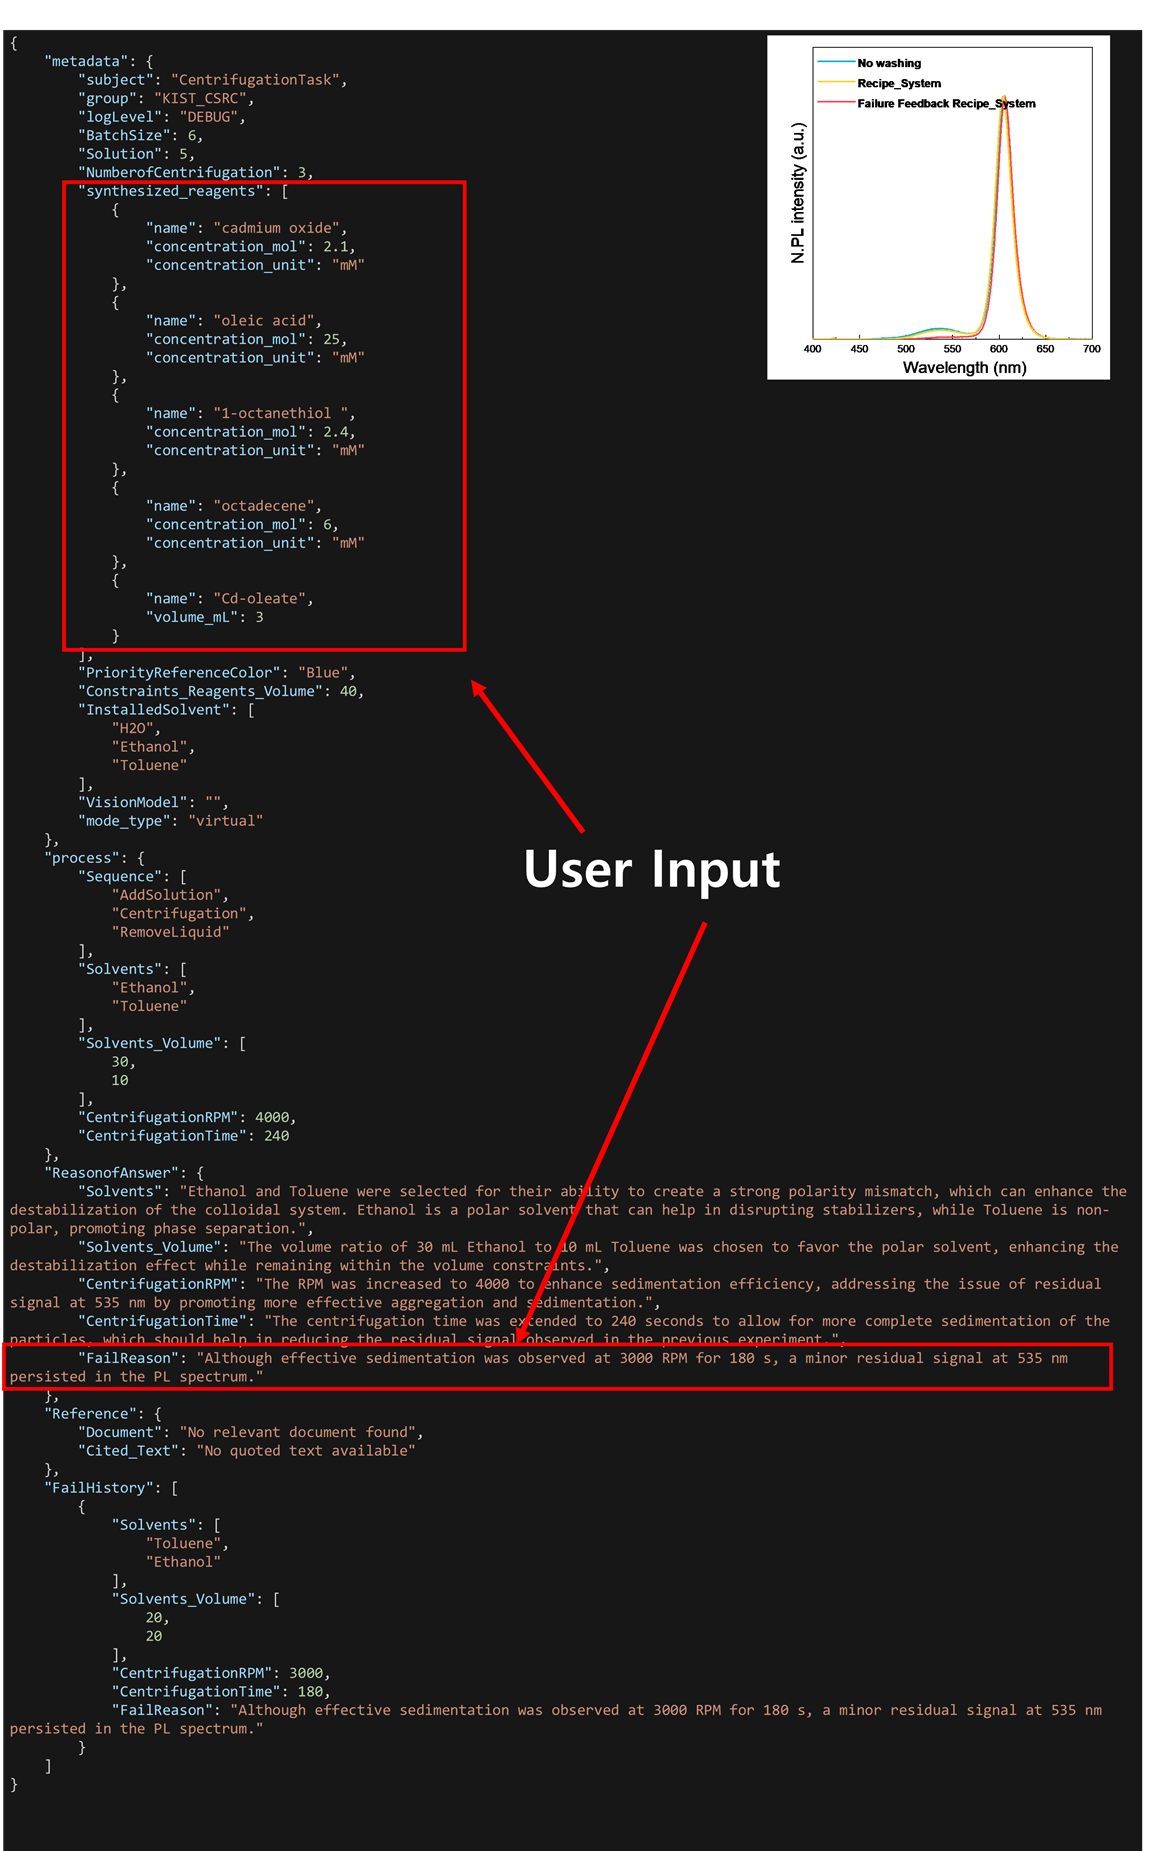


Supplementary Figure S25. TaskPlanner JSON generated by the LLM for CdSe/CdS QDs, incorporating one failure feedback loop.


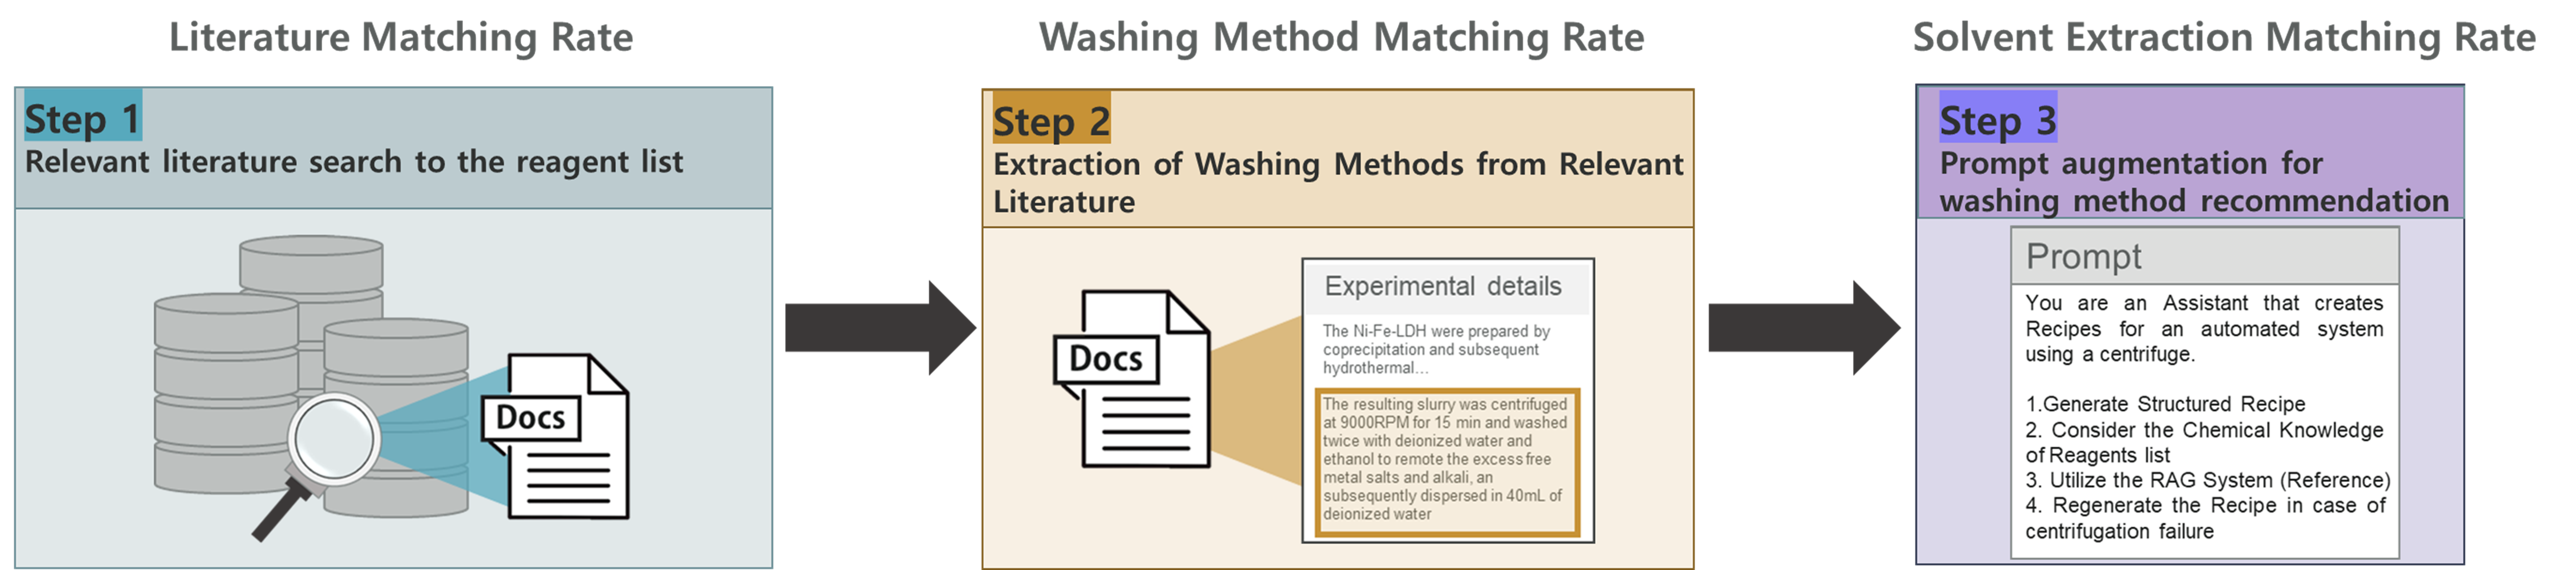


Supplementary Figure S26. Retrieval system performance test procedure.

## Supplementary Table S2. Retrieval system performance results

| Evaluation Metric | Accuracy |
| --- | --- |
| Literature Matching Rate | 96% |
| Washing Method Matching Rate | 94% |
| Solvent Extraction Matching Rate | 90% |

The evaluation was conducted using documents stored in OpenAI's Vector Store, with manually annotated ground truths specifying the reagents and washing methods referenced in each paper. The system was tested across three key aspects: (1) retrieving the correct literature based on given reagent inputs, (2) accurately extracting the washing methods from the retrieved documents, and (3) generating appropriate recipes based on extracted washing details. The system achieved a Literature Matching Rate of 96%, indicating robust retrieval capability even in cases involving chemically similar reagents. However, such similarities may occasionally lead to over-matching. The Washing Method Matching Rate was 94%, with errors often arising when multiple washing methods were described in a single paper, leading to partial extraction. The Solvent Extraction Matching Rate reached 90%, with failures primarily caused by sentence-level solvent co-occurrence (e.g., water and ethanol mentioned separately) being merged incorrectly into a single solvent list.

**4. Materials and Synthesis Details**

**Synthesis of NiFe LDHs**

In a typical synthesis, nickel(II) nitrate hexahydrate (Ni(NO3)2∙6H2O, 6 mmol),iron(III) nitrate nonahydrate (Fe(NO3)3∙9H2O, 2 mmol), and polyvinylpyrrolidone (PVP, 1 g) were dissolved in 50 ml of deionized water under magnetic stirring at room temperature. Separately, a mixed alkali solution was prepared by dissolving sodium hydroxide (NaOH, 12 mmol) and sodium carbonate (Na2CO3, 6 mmol) in 10 mL of deionized water. This alkali solution was then added dropwise to the metal precursor solution under continuous stirring. The resulting suspension was stirred for an additional 30 min at room temperature. The product was collected by centrifugation and washed three times using a mixture of deionized water and ethanol. Finally, the product was dried in an oven at 70 °C overnight.

**Synthesis of IrRu NPs via Antisolvent Reduction Method**

Ruthenium(III) chloride hydrate (RuCl3·xH2O, 0.053 mmol) and iridium(III) chloride hydrate (IrCl3·xH2O, 0.106 mmol) were dispersed in 2 mL of deionized water, followed by the addition of 4 mL deionized water containing 45 mg of polyvinylpyrrolidone (PVP). The solution was stirred at room temperature for 30 min to ensure homogeneity. Subsequently, 8 mL of ethanol was added as an antisolvent, and the mixture was stirred for an additional 30 min. Then, 4 mL of 0.3 M aqueous NaBH4 solution was introduced as a chemical reductant. The reaction was allowed to proceed under stirring for 1 h at room temperature. The resulting colloidal nanoparticles were collected by centrifugation and washed three times with deionized water and acetone. Finally, the product was dried in an oven at 70 °C overnight.

**Synthesis of CdSe/CdS QDs**

*Synthesis of CdSe core.* CdO (0.06 g), Octadecylphosphonic acid (0.28 g) and trioctylphosphine oxide (3 g) were placed in a 50 mL three-neck flask. The mixture was degassed at 150 °C for 1 h, and then heated to 340 °C in N2 gas. When the solution became colorless, 1 mL of trioctylphosphine (TOP) was injected rapidly, and the temperature of the solution was increased to 380 °C. Then, 0.5 mL of 1.52 M TOP:Se was injected, and the mixture was maintained for 10 s. Finally, the flask was cooled to room temperature. The CdSe core was then precipitated using acetone and dispersed in hexane.2

*Preparation of Cd-oleate added 1-octanethiol.* CdO (0.26 g), 6.4 mL of OA, and 10 mL of ODE were placed in a 50 mL three-neck flask and degassed at 100 °C for 1 h. The mixture was heated to 250 °C for 30 min in N2 gas. The flask was cooled to room temperature, and 0.42 mL of 1-octanethiol was injected into the reaction flask.

*Synthesis of core/shell CdSe/CdS QDs.* To synthesize the CdSe/CdS core/shell, 300 nmol of CdSe core was dissolved in 30 mL of ODE and degassed at 100 ℃ for 1 h. The mixture was heated to 300 ℃. When the temperature of the solution attained 240 ℃, 9 mL of Cd-oleate mixed with 1-octanethiol was injected at a rate of 9 mL/h. After the precursor was injected, the solution was annealed for 1 h and cooled to room temperature. The CdSe/CdS core–shell was precipitated using toluene and ethanol.

**Electrochemical characterization**

OER polarization curves were recorded in 1.0 M KOH aqueous solution using a conventional three-electrode system, connected to a VersaSTAT 3 potentiostat (AMETEK, USA). A carbon paper electrode, coated with the catalyst, was used as the working electrode; a graphite rod and a Hg/HgO electrode served as the counter and reference electrodes, respectively. All measured potentials were converted to the reversible hydrogen electrode (RHE) scale using the equation:

Catalyst ink was prepared by dispersing 3.0 mg of the synthesized product in a mixture of 0.30 mL deionized water, 0.68 mL ethanol, and 0.02 mL Nafion solution (5 wt%). The suspension was sonicated for 30 min to obtain a homogeneous dispersion. An appropriate volume of this ink was drop-cast onto carbon paper to achieve a mass loading of approximately 0.255 mg cm⁻², followed by drying at room temperature.

Prior to OER measurements, the electrodes were electrochemically activated by cyclic voltammetry from 0.2 to 0.6 V vs. Hg/HgO at a scan rate of 50 mV s⁻¹ for 30 cycles. Linear sweep voltammetry (LSV) was then performed at a scan rate of 5 mV s⁻¹. The resulting current densities were normalized to the geometric area of the working electrode (0.2 cm²). All measurements were conducted at room temperature under ambient conditions.

# Reference

1. OpenAI (2025). OpenAI VectorStore. <https://platform.openai.com/storage/vector_stores>.

2. Gwak, N., Lee, M.W., Kim, S., Shin, S., Lee, Y., Roh, J., Jeong, I., Seo, J., Na, J.N., and Oh, N. (2025). Comparative Study of Two Different Quasi-Type II Heterostructured Quantum Dots for Enhanced Electroluminescence. Acs Photonics *12*, 944-951. 10.1021/acsphotonics.4c01995.
